# Supplementary material for: Design of an Interferon-Resistant Oncolytic HSV-1 Incorporating Redundant Safety Modalities for Improved Tolerability
Source: PubMed Central journal article supplement — Mol Ther Oncolytics. 2020 Aug 8;18:476–90. doi: 10.1016/j.omto.2020.08.004 (PMC7479328; doi:10.1016/j.omto.2020.08.004), 2020-08-08
Supplement: mmc2.pdf [file mmc2.pdf]

# Design of an Interferon-Resistant Oncolytic HSV-1 Incorporating Redundant Safety Modalities for Improved Tolerability

Edward M. Kennedy,<sup>1,5</sup> Terry Farkaly,<sup>1,5</sup> Peter Grzesik,<sup>1</sup> Jennifer Lee,<sup>1</sup> Agnieszka Denslow,<sup>1</sup> Jacqueline Hewett,<sup>1</sup> Jeffrey Bryant,<sup>1</sup> Prajna Behara,<sup>1</sup> Caitlin Goshert,<sup>1</sup> Daniel Wambua,<sup>1</sup> Ana De Almeida,<sup>1</sup> Judith Jacques,<sup>1</sup> Damian Deavall,<sup>2</sup> James B. Rottman,<sup>3</sup> Joseph C. Glorioso,<sup>4</sup> Mitchell H. Finer,<sup>1</sup> Brian B. Haines,<sup>1</sup> Christophe Quéva,<sup>1</sup> and Lorena Lerner<sup>1</sup>

<sup>1</sup>Oncorus, Inc., Cambridge, MA, USA; <sup>2</sup>ApconiX, Alderley Park, Mereside, Macclesfield, UK; <sup>3</sup>Athenaeum Pathology Consulting, LLC, Sudbury, MA, USA; <sup>4</sup>Department of Microbiology and Molecular Genetics, School of Medicine, University of Pittsburgh, Pittsburgh, PA, USA

**Development of next-generation oncolytic viruses requires the design of vectors that are potently oncolytic, immunogenic in human tumors, and well tolerated in patients. Starting with a joint-region deleted herpes simplex virus 1 (HSV-1) to create large transgene capability, we retained a single copy of the ICP34.5 gene, introduced mutations in UL37 to inhibit retrograde axonal transport, and inserted cell-type-specific microRNA (miRNA) target cassettes in HSV-1 genes essential for replication or neurovirulence. Ten miRNA candidates highly expressed in normal tissues and with low or absent expression in malignancies were selected from a comprehensive profile of 800 miRNAs with an emphasis on protection of the nervous system. Among the genes essential for viral replication identified using a small interfering RNA (siRNA) screen, we selected ICP4, ICP27, and UL8 for miRNA attenuation where a single miRNA is sufficient to potently attenuate viral replication. Additionally, a neuron-specific miRNA target cassette was introduced to control ICP34.5 expression. This vector is resistant to type I interferon compared to ICP34.5-deleted oncolytic HSVs, and in cancer cell lines, the oncolytic activity of the modified vector is equivalent to its parental virus. *In vivo*, this vector potently inhibits tumor growth while being well tolerated, even at high intravenous doses, compared to parental wild-type HSV-1.**

## INTRODUCTION

A central goal of next-generation oncolytic viral therapies is the design of strategies to support potent replication in cancer cells to promote oncolysis and release of tumor antigens while limiting viral replication in permissive healthy tissues. Typically, viral factors that dictate natural cellular tropism are deleted from oncolytic vectors, attenuating viral replication in most healthy tissues. These modifications can, however, limit the oncolytic activity in some tumor cells that may retain intrinsic or stromal-derived antiviral response, or may constitutively express antiviral genes, or, like cancer stem cells, may not be actively cycling.<sup>1-4</sup> Starting with HSV-1, the only oncolytic virus with a track of regulatory approval in major geographies,

we sought to develop a novel vector backbone with a broadened therapeutic index and enhanced antitumor activity.

Oncolytic herpes simplex virus 1 (oHSV-1) viruses commonly employ the inactivation of the ribonucleotide reductase encoded by the ICP6 gene, or the deletion of neurovirulence factor ICP34.5, an inhibitor of the innate antiviral response mediated by type I interferon (IFN) and a mediator of eIF2 dephosphorylation downstream of EIF2AK2 (PKR), to limit replication in healthy tissue.<sup>5,6</sup> ICP34.5 antagonizes multiple arms of the innate response, including signaling by PKR and TANK binding kinase (TBK1) signaling, and Beclin1-mediated apoptosis.<sup>7-9</sup> ICP34.5-deleted viruses were found to be well tolerated in human clinical trials, although some viruses like H1716 and talimogene laherparepvec are described to replicate in discrete brain structures, such as the ependyma<sup>10</sup> and myenteric neurons in immune-deficient mice.<sup>11</sup> Another approach to enhance the tumor selective replication of oHSV vector is to express ICP34.5 under a tumor specific promoter, such as rQNestin34.5, an oHSV being developed for the treatment of glioma.<sup>12</sup> Similarly, we hypothesized that ICP34.5 retention would stimulate viral replication in malignancies with residual type I IFN signaling or with basal IFN-dependent antiviral states.<sup>1,2,13,14</sup> Therefore, the retention of ICP34.5 would potentially enhance oHSV replication and potency, but retaining the neurovirulence gene would require a novel strategy for robust and specific inhibition of replication in HSV-1 permissive normal tissues, including the nervous system. Ideally, this strategy would encompass conditional switches that would be redundantly engineered in HSV-1 genome to prevent inactivation by rearrangement through recombination and yet responsive to factor expressed in genetically stable normal cells and absent in tumor cells.

Received 13 February 2020; accepted 7 August 2020;  
<https://doi.org/10.1016/j.omto.2020.08.004>.

<sup>5</sup>These authors contributed equally to this work.

**Correspondence:** Lorena Lerner, PhD, Oncorus, Inc., 50 Hampshire Street, Suite 401, Cambridge, MA 02139, USA.

**E-mail:** [lorena.lerner@oncorus.com](mailto:lorena.lerner@oncorus.com)

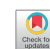

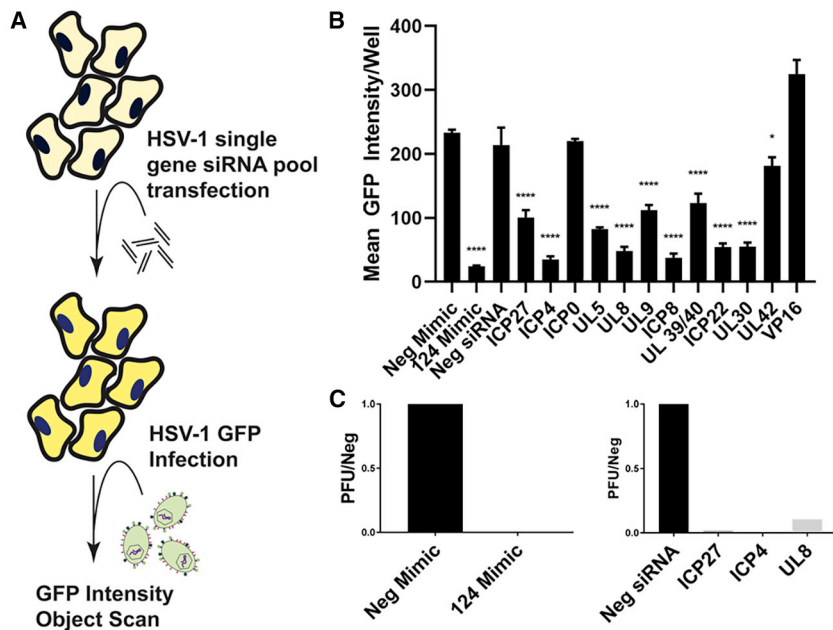

**Figure 1. Identification of HSV-1 Genes Essential to Viral Replication When Targeted With RISC-Loaded siRNAs**

(A) A schematic representation of the experimental design is depicted; a pooled siRNA transfection assay was performed and HSV-1 replication (GFP reporter) was measured by array scanning cytometry. (B) Endpoint (48 hours post infection) GFP intensity per infected well is shown for each transfected siRNA pool. Levels of viral replication for the siRNA pools targeting the viral genes were compared to the negative siRNA. (C) Plaque titers are shown for control miRNAs in the left panel, and siRNA pools for the 3 attenuation candidates ICP27, ICP4, and UL8 in the right panel. GFP, green fluorescent protein; miRNAs, microRNAs; Neg, negative; siRNA, small interfering RNA; PFU, plaque-forming unit. One-way ANOVA Dunnett's multiple comparisons test was used for statistical analysis. \* $p < 0.05$ ; \*\* $p < 0.001$ ; \*\*\* $p < 0.005$ ; \*\*\*\* $p < 0.0001$ .

Here, we describe ONCR-159, a novel oHSV vector that retains one copy of the ICP34.5 gene and whose tumor selectivity is determined by the insertion of microRNA (miRNA) responsive target elements (miR-T) to control the expression of viral genes essential for replication and ICP34.5. We describe the evaluation of viral genes that were targeted with miRNA target cassettes and the expression profiling of the tissue-specific miRNAs selected for the engineering of the miR-T cassettes introduced in ONCR-159. Furthermore, we engineered an orthogonal neuron-specific safety mechanism by introducing the mutations in the UL37 tegument protein recently identified to eliminate retrograde axonal transport of the viral capsid.<sup>15</sup>

ONCR-159 benefits from additional improvements, namely the deletion of the joint region, which expands its transgene payload capacity to >20 kb, the inactivation of US12 to allow direct antigen presentation, and the gB:NT (D285N and A549T) mutant to promote infectivity.<sup>16,17</sup> We present the preclinical characterization of ONCR-159 and demonstrate that it replicates efficiently in the presence of type I IFN challenge. ONCR-159 replication is effectively attenuated by distinct tissue miRNAs. ONCR-159 is well tolerated *in vivo* in the permissive BALB/c mouse at high doses following administration via multiple routes of administration, including single and multiple intravenous injections. These characteristics and the large payload capacity of this vector provide the basis for facile construction of multiple armed oncolytic viruses (OVs) that can address the unique immune suppressive drivers in the tumor microenvironment.

## RESULTS

### siRNA Screen Identifies Candidate HSV-1 Genes for Attenuation

To increase the breadth of normal tissues protected from HSV-1 replication, we expanded viral attenuation mechanism to multiple essential viral genes with multiple miR-T cassettes. Ideally, the viral

gene candidates would be essential for viral replication, preferably expressed at low copy number, and would be required to advance the early phases of the viral life cycle to avoid both viral early gene toxicity and progression to replication. A small interfering RNA (siRNA) screen was performed to identify optimal HSV-1 genes to be attenuated.

To model miRNA cleavage of a complementary target, we transfected pools of 3 siRNAs (Table S1) per HSV-1 gene in A253 cells, a oHSV permissive human submaxillary salivary gland cell line, that can be transfected with high efficiency (data not shown). These transfected cells were utilized to evaluate the effect of RNA-induced silencing complex (RISC)-mediated degradation of viral RNA on the inhibition of viral spread and infectious particle production (Figure 1A). Twenty-four hours post-transfection, A253 cells were infected with a reporter oHSV vector encoding green fluorescent protein (GFP) fused to the HSV-1 glycoprotein C (gC-T2A-GFP).<sup>18</sup> GFP intensity was monitored over time as a proxy for viral spread.

Our first-generation vector, ONCR-125, which encodes a miR-124 response element (miR-124T) consisting of four tandem copies of the reverse complement of mature miR-124-3p sequences in the 3' UTR of the ICP4 gene, was used to infect A253 cells and transfected with hsa-miR-124-3p mimic to be used as our positive control for the screen. When we compared ONCR-125 in cells transfected with hsa-miR-124-3p mimic to the non-targeting control mimic, we observed a 95% reduction of viral spread and replication measured as GFP intensity (Figure 1B;  $p < 0.0001$ ). Levels of viral replication in cells transfected with siRNA pools targeting various HSV-1 genes were compared to negative siRNA control. We first assessed the efficiency of knockdown for each siRNA pool with nanoString and qRT-PCR, and we observed almost complete suppression of all genes targeted with the exception of RL2 encoding ICP0 (50%), US1 encoding ICP22 (42%), UL42 (0%), and UL48 encoding VP16 (0%); therefore,

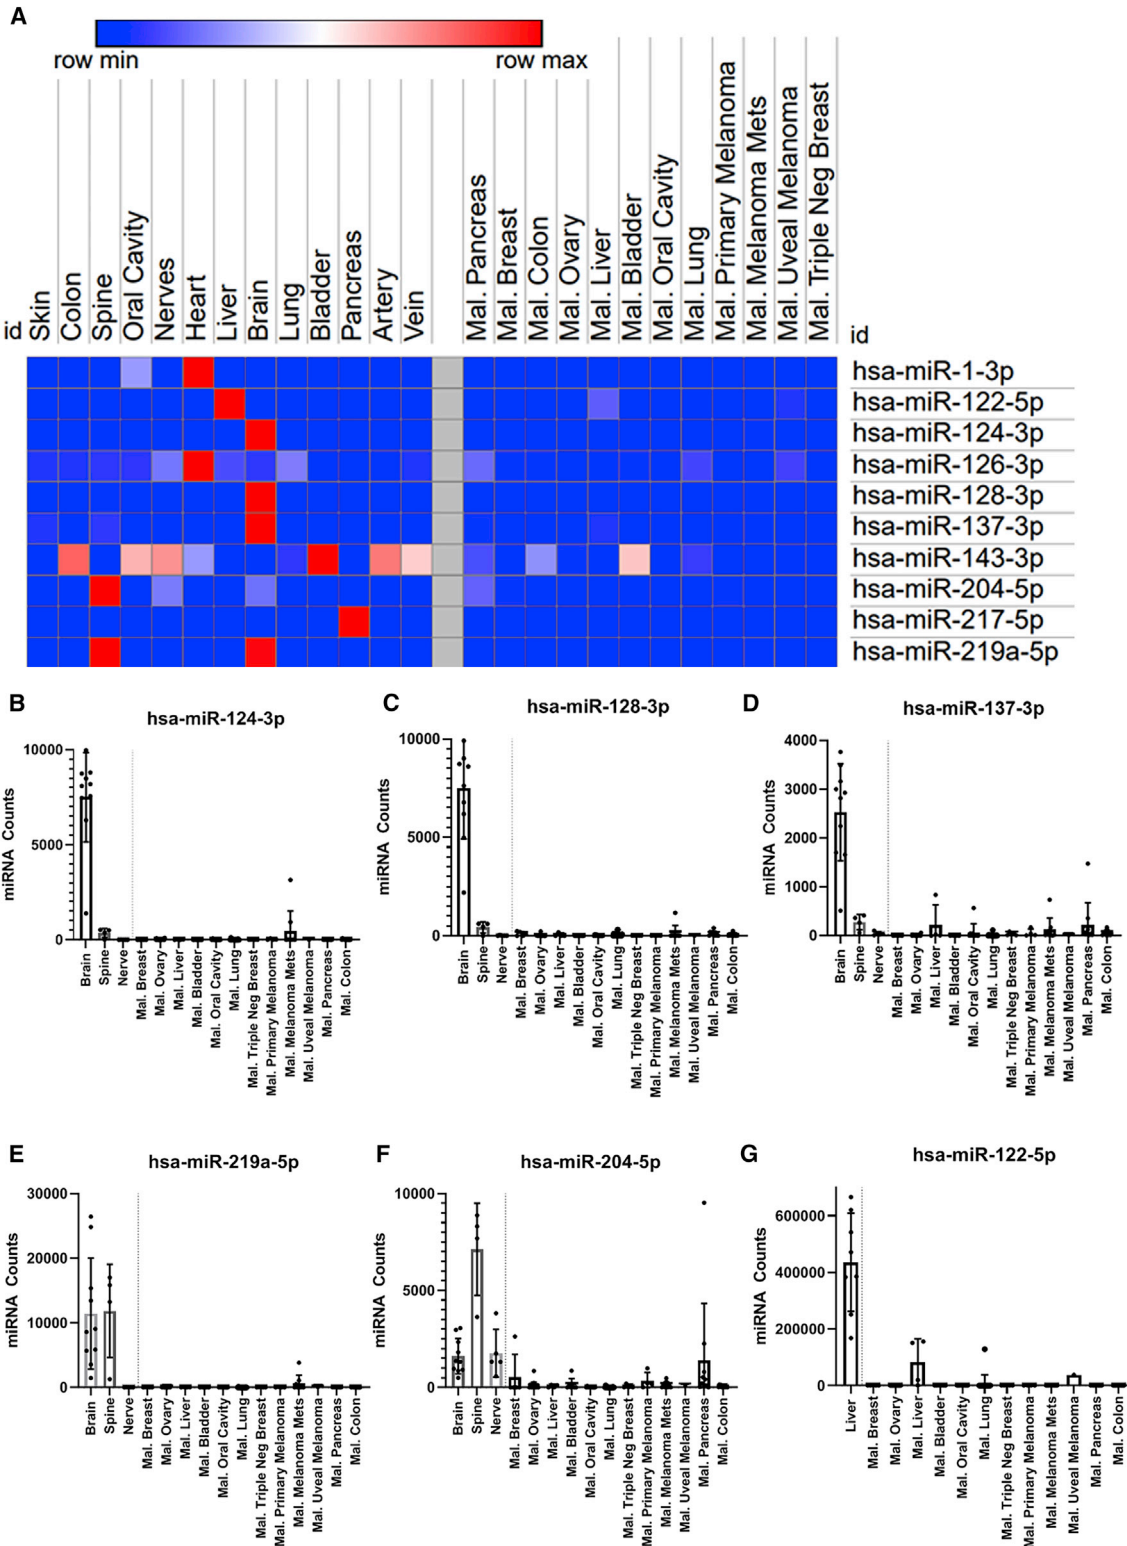

(legend on next page)

these genes were not considered for miR-T inclusion (Figure S1). When siRNA pools were efficacious knocking down the expression of the HSV-1 genes, we also observed a significant reduction of viral spread and replication of 60% for UL54 encoding ICP27, 87% for RS1 encoding ICP4, 61% for UL5, 83% for UL8, 53% for UL9, 87% for UL29 encoding ICP8, 45% for UL 39/40, 79% for US1 encoding ICP22, and 79% for UL30. As expected for the HSV-1 genes where effective siRNA knockdowns were not observed, such as UL42 and VP16 (UL48), low or no inhibition of viral spread and replication was observed with these pools (Figures 1B and S1). Overall there were several genes where effective siRNA knockdown resulted in significant inhibition of viral replication, confirming that these HSV-1 genes are potential candidates for attenuation.

While sites that demonstrated significant reduction of viral replication were all considered appropriate sites to insert miR-T cassettes, we selected the 3' UTR of UL8 for insertion as it shares a polyadenylation site with UL9, yielding to the potential repression of two HSV-1 essential gene transcripts with a single miR-T cassette.<sup>19</sup> UL9 is the origin binding protein and UL8 is a subunit of the helicase-primase complex; these 2 proteins are essential for HSV-1 DNA replication and represent a functional block to DNA synthesis and late gene expression. To validate UL8 and the 2 other loci, ICP4 and ICP27, which were previously shown to be good candidates for viral attenuation when miRNA target sites were inserted in their 3' UTR, we used a plaque titer assay to measure viral production after transfection with the corresponding siRNA targeting these genes.<sup>20,21</sup> As shown in Figure 1C, almost complete inhibition of infectious virus particle production was observed when any of these 3 genes, ICP27 (UL54), ICP4 (RS1), and UL8, were silenced through repression of their transcripts.

### Selection of miRNA Candidates for oHSV Attenuation

The design of the attenuation strategy for ONCR-159 required careful consideration of the tissues that are most permissive to HSV-1 replication and those that are most likely to be exposed to these viruses after intratumoral (IT) administration in tumors of interest, including squamous cell carcinoma of the head and neck (SCCHN), skin cancers, primary cancers, and metastases of the liver. Thus, our primary focus has been the protection of the central and peripheral nervous system, followed by protecting tissues including the liver, pancreas, and muscles that may be in the vicinity of tumors in indications of interest. To identify multiple miRNAs to include in miR-T cassettes to protect these tissues, we broadly expression profiled primary human normal and malignant tissues to select miRNAs that are specifically and highly expressed in healthy tissue but not in tumors.

Total RNA from snap frozen human normal (n = 110) and malignant tissues (n = 104) were prepared and profiled for miRNA expression (Tables S2–S4) using the nanoString miRNA panel v3, that allows the simultaneous measurement of 800 miRNAs from a single sample. The nanoString data was normalized, rank ordered for comparison, presented in a heat-map for several primary human tissues profiled compared to malignant tissues of various types (Figure 2A), and validated using qRT-PCR for a small panel of selected miRNA (Figure S2), demonstrating that the fold change miRNA levels in tissue measure by nanoString are similar to those measured by miRNA qRT-PCR. To assess the expression of miRNAs that could potentially protect the nervous system, we profiled brain, spinal cord, and peripheral nerves. Several miRNAs—hsa-miR-124-3p, hsa-miR-128-3p, hsa-miR-137-3p, hsa-miR-219a-5p, and hsa-miR-204-5p—were highly expressed specifically in the human brain (Figures 2B–2F). We also observed elevated levels of hsa-miR-204-5p and hsa-miR-219a-5p in spinal cord and elevated expression of hsa-miR-204-5p in nerves. In skeletal or cardiac muscle (Figure S3A), we found that hsa-miR-1-3p was highly expressed specifically in the heart, an organ potentially at risk if oHSV enters into the bloodstream. In organs with a high content of smooth muscle such as the lung and bladder, we observed high levels of hsa-miR-143-3p in these tissues; however, occasionally, a lower level signal was observed in malignant tissue presumably from contaminating margins during resection (Figure S3B).

Liver tissue was also a priority for profiling as image-guided repeated injection of either liver metastases or primary hepatocellular carcinoma is clinically feasible.<sup>22</sup> We determined that hsa-miR-122-5p was highly expressed in normal liver tissue (Figure 2G) as previously shown<sup>23,24</sup> compared to tumor tissue. Specifically, the expression level was 12,309-fold ( $p < 0.0001$ ) over the average expression in colorectal cancer (CRC) samples and pancreatic cancer samples, 2 tumor histologies that are likely to metastasize to the liver. We also profiled several samples from normal human pancreas and identified hsa-miR-217-5p as being highly expressed (Figure S3C); therefore, it was also included in our cassette design to expand normal attenuation to the pancreas. In addition, hsa-miR-126-3p is known to be highly expressed by endothelial cells and has been considered in the attenuation strategy to prevent the spread of oHSV from the vasculature.<sup>25,26</sup> Hsa-miR-126-3p is broadly expressed in healthy tissues, particularly in the heart, but was also detected in tumor tissues (Figure S3D); we reasoned that this signal likely originated from tumor margins or vasculature. For these selected miRNAs, there is substantial support for both their magnitude and tissue specific expression in the literature.<sup>27,28</sup>

## Figure 2. Global Expression Profiling of Human Normal and Malignant Tissue miRNAs

Tissue miRNA Profiling Identifies miRNAs for Host Tissue Protection. (A) Heatmap summary of miRNA ratios between the mean of the normal group to the malignant group was generated using the Broad Institute Morpheus software. Ratio of each candidate miRNA is normalized within its individual row to illustrate miRNA expression level for each tissue type. Counts in the red indicate high levels of miRNA present within that tissue type. Counts in blue indicate reduced levels of miRNA present in that tissue type. In (B) hsa-miR-124-3p, (C) hsa-miR-128-3p, (D) hsa-miR-137-3p, (E) hsa-miR-219a-5p, (F) hsa-miR-204-5p individual neuronal nanoString counts for each miRNA are compared to each malignant tissue profiled. Brain and spine are significantly higher than malignant tissues for all 5 neuronal miRNAs. (G) Individual nanoString miRNA counts in liver are compared to each malignant tissue profiled. Normal liver tissue is significantly higher across all malignant tissues.



Despite the fact that all these human mature miRNAs are completely conserved in the mouse (Table S5), we profiled miRNA expression in normal mouse tissue to ensure that they recapitulate both the tissue specificity and magnitude of miRNA expression found in human tissues. We performed murine nanoString miRNA panels for all 216-overlapping miRNA with 100% identical sequence (Figures S4A–S4D). To further examine miRNA enriched in each tissue type profiled, we compared human and murine miRNA expression for heart, liver, spine, and brain (Figures S5A–S5D) with all miRNA selected for inclusion into ONCR oHSV vector, and demonstrated that all these 10 miRNAs have similar tissue specificity and expression levels when comparing mouse to human tissues. In summary, our profiling data led us to select 10 miRNA candidates that demonstrated low or no expression in malignant tissue. By contrast, they were significantly highly expressed in human and murine normal tissues such as central/peripheral nervous system, heart/skeletal muscle, liver, lung, and pancreas (Table 1; Figure 2A).

#### Design of a Next-Generation miR-T Cassette

We developed the miR-T cassette design pipeline *in silico* (Figure S6A) with the top 10 miRNA candidates selected. First, we wanted to insert tissue-specific miRNA target sequences such that they are not repeated back-to-back to avoid RISC steric hindrance. Then, since some tissue-specific miRNAs are not co-expressed in the same cell type (i.e., mutually exclusively), we used these candidates as spacers for their neighbors' target sequences by interleaving these targets.<sup>29</sup> These miR-T cassettes were also designed to circumvent large repeats to avoid viral genomic recombination and to remove tumor-expressed miRNA ("OncomiR") seed targets and canonical polyadenylation sites (Figure S6A). It is also well known that RISC is minimally effective in highly structured target regions; thus, we predicted the most appropriate structure cassettes and selected those with minimal secondary structure. These tasks were automated *in silico* with a script (Figure S6A, see Methods) and yielded cassettes of approximately 315 nucleotides designed for the 4 HSV-1 loci of interest, ICP4, ICP27, UL8, and ICP34.5. Each of these miR-T cassettes contains 3 miRNA cognate targets repeated 4 four times with 4 base spacers.

To validate the function of the miR-T cassette, we employed a dual luciferase assay that evaluates the ability of each individual miRNA to inhibit the expression of a renilla luciferase normalized for transfection efficiency with firefly luciferase (psiCHECK-2, Promega) in cells transfected with miRNA mimics, which are small chemically modified double-stranded mature miRNA designed to mimic endogenous miRNA.<sup>30</sup> Each miRNA mimic inhibited luciferase expression within each miR-T cassette, ranging from 47%–75% for miR-T-UL8 ( $p = 0.0025$ ), 46%–87% for miR-T-ICP4 ( $p = 0.0521$ ), 34%–48% for miR-T-ICP27 ( $p = 0.0319$ ), and 33%–66% for T-ICP34.5 ( $p = 0.103$ ), indicating that this strategy confers potent inhibition of gene expression *in vitro* (Figures S6B–S6E).

#### Development of the Next-Generation oHSV Vectors ONCR-157 and ONCR-159

We derived ONCR-157 and ONCR-159 from a parental vector, ONCR-125. ONCR-125 is a replication-attenuated HSV-1 that differs

from the KOS strain with the following modifications (shown in Figure 3A): deletion of the joint region, the introduction of a gateway recombination cassette in the UL3/UL4 intergenic region for facilitating transgene insertion, a null mutation in US12, to promote antigen presentation on MHC-class I, the mutation of amino-acids D285N and A549T in the fusogenic glycoprotein B (gB) to enhance viral entry, GFP fused to glycoprotein C (gC) via a T2A peptide sequence, and insertion of a single miR-T-124 insertion in the 3' UTR of the essential gene ICP4.<sup>16,18,31–33</sup> ONCR-157 and ONCR-159 were generated by sequential modification ONCR-125 as described in Figure 3A. miR-T cassettes were inserted in the 3' UTR of ICP4, ICP27, ICP34.5, and UL8 genes. Deletion of GFP gene from gC gene restored KOS wild-type sequence. Null mutations were introduced in ICP47. To combine this modality with mutations shown to eliminate retrograde transport to the central nervous system (CNS), we produced ONCR-157 and ONCR-159, 2 oHSV-1 variants of our base vector with either miRNA attenuation alone (ONCR-157), or miRNA attenuation and UL37 mutagenesis of the R2 region as described by Richards et al.<sup>15</sup> (ONCR-159; Figure 3A).

#### Single miRNA Expression Is Sufficient to Attenuate or Eliminate Viral Replication

To evaluate the ability of each miRNA to attenuate viral replication functionally, and to confirm our overall miRNA attenuation strategy (Figure 3B), we developed a miRNA mimic assay that reproduces physiological conditions. ONCR-159 replication was inhibited entirely in A253 cells transiently transfected with miR-124-3p, miR-143-3p, miR-219a-5p, miR-122-5p, or miR-137-3p mimics. In cells transfected with miR-1-3p, miR-128-3p, miR-217-5p, and miR-126-3p mimics, ONCR-159 replication was attenuated 95%, 80%, 90%, and 80%, respectively ( $p = 0.02$  for miR-128-3p and  $p < 0.00001$  for all other miRs; Figures 3C and S7). To confirm that transfection of miRNA mimics results in physiologically relevant intracellular levels, we compared A253 mimic-transfected cells to tissue levels with miRNA-specific Taqman assays. We demonstrated that the expression level of neuronal miRNAs hsa-miR-124-3p, hsa-miR-128-3p, and hsa-miR-137-3p in A253 mimic-transfected cells were below those observed in primary human tissue (Figure S8), supporting the physiological relevance of the findings with the mimic assay.

#### ONCR-159 Is Resistant to Type I IFN and Comparably Lytic to Their Predecessors

The purpose of developing a virus that is conditionally replicating based on miRNA expression has been to retain a copy of the ICP34.5 gene and enable replication in the presence of a residual antiviral type I IFN response. We compared the replication of our base vectors ONCR-125, ONCR-157, and ONCR-159 to an established oHSV-1 vector lacking both copies of ICP34.5 (G207) in the presence of type I IFN challenge.<sup>5</sup> For this test, we used 2 cancer cell lines that were previously confirmed to be capable of responding to IFN- $\alpha$  by monitoring Stat1 phosphorylation and interferon stimulated gene 15 (ISG15) expression when pretreated with 500U IFN- $\alpha$ , and robust IFN signaling and ISG induction were observed (Figure 4A, left panels). Next, these cell lines were infected with either G207,

**Table 1. miRNA Profiling Data Summary and Statistics**

| miRNA           | Tissue (Central & Peripheral Nervous System) | Mean Normal <sup>a</sup> | Mean Malignant <sup>b</sup> | FC/Malignant <sup>c</sup> | p Value <sup>d</sup> |     |        |
|-----------------|----------------------------------------------|--------------------------|-----------------------------|---------------------------|----------------------|-----|--------|
| hsa-miR-124-3p  | brain                                        | 7,502.2                  | 53.9                        | 139.2                     | 0.0001               |     |        |
|                 | spine                                        | 361.6                    |                             | 6.7                       | 0.0611               |     |        |
|                 | nerve                                        | 4.6                      |                             | 0.1                       | 0.7335               |     |        |
| hsa-miR-128-3p  | brain                                        | 7,505.3                  | 49.8                        | 150.8                     | 0.0001               |     |        |
|                 | spine                                        | 420.6                    |                             | 8.4                       | 0.0001               |     |        |
|                 | nerve                                        | 10.5                     |                             | 0.2                       | 0.5145               |     |        |
| hsa-miR-137     | brain                                        | 2,531.7                  | 61.9                        | 40.9                      | 0.0001               |     |        |
|                 | spine                                        | 278.1                    |                             | 4.5                       | 0.0265               |     |        |
|                 | nerve                                        | 43.8                     |                             | 0.7                       | 0.832                |     |        |
| hsa-miR-204-5p  | brain                                        | 1,612.7                  | 225.2                       | 7.2                       | 0.0001               |     |        |
|                 | spine                                        | 7,128.9                  |                             | 31.7                      | 0.0001               |     |        |
|                 | nerve                                        | 1,762.1                  |                             | 7.8                       | 0.0011               |     |        |
| hsa-miR-219a-5p | brain                                        | 11,430.9                 | 85                          | 134.5                     | 0.0001               |     |        |
|                 | spine                                        | 11,847.8                 |                             | 139.4                     | 0.0001               |     |        |
|                 | nerve                                        | 7.9                      |                             | 0.1                       | 0.6602               |     |        |
| miRNA           | Tissue (Other Host Tissues of Interest)      | Mean Normal <sup>a</sup> | Mean Malignant <sup>b</sup> | FC/Malignant <sup>c</sup> | p Value <sup>d</sup> |     |        |
| hsa-miR-1-3p    | oral cavity                                  | 29,025.7                 | 249                         | 116.6                     | 0.0001               |     |        |
|                 | heart                                        | 98,978.5                 |                             | 397.5                     | 0.0001               |     |        |
| hsa-miR-122-5p  | liver                                        | 435,875.4                | 4,801.2                     | 90.8                      | 0.0001               |     |        |
|                 | bladder                                      | 6,898.4                  |                             | 0.6                       | 0.2592               |     |        |
|                 | lung                                         | 28,685.4                 |                             | 2.6                       | 0.0001               |     |        |
|                 | brain                                        | 14,516.7                 |                             | 1.3                       | 0.4214               |     |        |
|                 | liver                                        | 19,348.1                 |                             | 1.8                       | 0.1077               |     |        |
|                 | heart                                        | 102,967.6                |                             | 9.5                       | 0.0001               |     |        |
|                 | nerve                                        | 27,449.8                 |                             | 2.5                       | 0.0119               |     |        |
|                 | hsa-miR-126-3p                               | oral cavity              |                             | 13,779.6                  | 10,831.8             | 1.3 | 0.5232 |
|                 |                                              | spine                    |                             | 14,236.6                  |                      | 1.3 | 0.6379 |
|                 |                                              | pancreas                 |                             | 3,631.8                   |                      | 0.3 | 0.1065 |
|                 |                                              | vein                     |                             | 12,678.6                  |                      | 1.2 | 0.756  |
|                 |                                              | artery                   |                             | 9,273.8                   |                      | 0.9 | 0.852  |
|                 |                                              | skin                     |                             | 15,504.1                  |                      | 1.4 | 0.5284 |
| colon           |                                              | 11,710.1                 | 1.1                         | 0.8925                    |                      |     |        |
| hsa-miR-143-3p  | bladder                                      | 16,787                   | 2,182                       | 7.7                       | 0.0001               |     |        |
|                 | heart                                        | 5,070.1                  |                             | 2.3                       | 0.2215               |     |        |
|                 | nerve                                        | 11,945.3                 |                             | 5.5                       | 0.0017               |     |        |
|                 | oral cavity                                  | 17,442.7                 |                             | 8                         | 0.0124               |     |        |
|                 | vein                                         | 9,466.5                  |                             | 4.3                       | 0.0017               |     |        |
|                 | artery                                       | 12,753.9                 |                             | 5.8                       | 0.0045               |     |        |
|                 | colon                                        | 15,590.1                 |                             | 7.1                       | 0.0003               |     |        |
| hsa-miR-217     | pancreas                                     | 5,636.7                  | 27.9                        | 202.3                     | 0.0001               |     |        |

FC, fold change.

<sup>a</sup>Mean miRNA counts for each relevant normal tissue for each individual miRNA.

<sup>b</sup>Mean miRNA counts for all malignant tissues for each individual miRNA.

<sup>c</sup>Fold change over malignant (FC/malignant) was calculated by dividing the mean normal count over the mean of all malignant tissues for each individual miRNA.

<sup>d</sup>The p value was calculated using a two-tailed parametric paired t test between each normal tissue miRNA count versus all malignant for each individual miRNA.

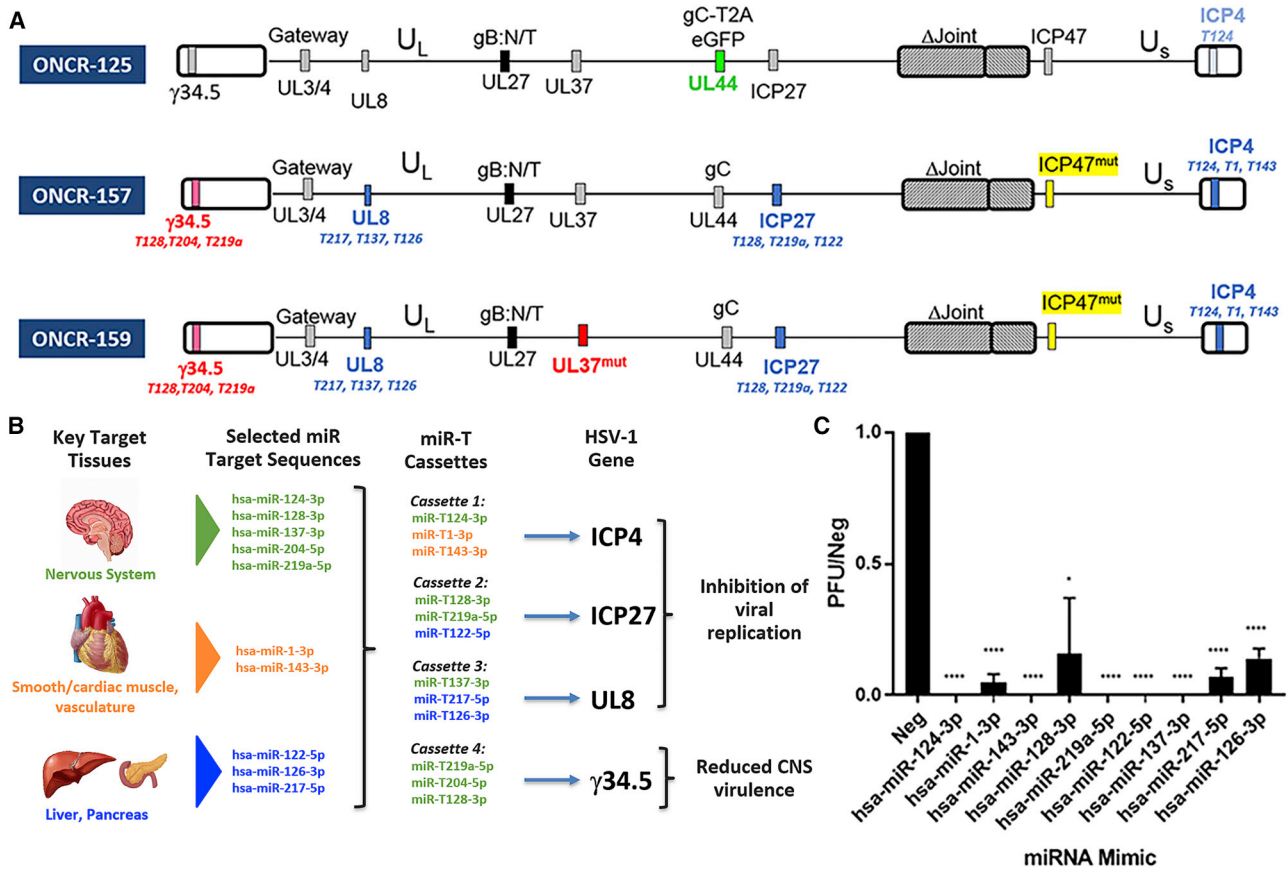

**Figure 3. ONCR-159 Incorporates Multiple Modifications Including Next-Generation miR-T Cassettes That Are Efficiently Attenuated by Multiple miRNAs** (A) Depicts the vector maps of the predecessors leading to ONCR-159. ONCR-159 contains 4 miR-T cassettes and the UL37 mutations. (B) Schematic representation of the overall miRNA attenuation strategy including tissue protected, miRNAs selected from each tissue group, and the HSV-1 gene of interest where the miR-T has been inserted. Green represents the CNS, orange smooth, and cardiac/skeletal muscle, and blue soft tissue (e.g., liver and pancreas) protection. (C) ONCR-159 viral replication in miRNA-mimic pretreated A253 cells is shown as a ratio of the negative control mimic (PFU/neg). The miRNA mimics is labeled on the x-axis. Statistical significance was calculated using Bonferroni-Dunn Student's t-test, \* $p = 0.02$ , \*\*\*\* $p < 0.00001$ . CNS, central nervous system; PFU, plaque forming units; Neg, negative.

ONCR-157, or ONCR-159 (ICP34.5<sup>+</sup>; Figure 4A, right panels). We observed that in NCI-H1299 cells pretreated with IFN- $\alpha$ , ONCR-159 replication decreased by ~4- to 6-fold. By contrast, the replication of G207 was completely inhibited. A similar phenotype was observed in NCI-H1975 tumor cell line.

As a result of ongoing, extensive modification of these backbones, we assessed whether these modifications would impact viral replication and oncolysis. Using a cell viability assay (CellTiter-Glo Luminescent Cell Viability Assay Kit, Promega, Madison, WI, USA) in the cancer cell lines A375 (melanoma), SK-MEL-28 (melanoma), COLO-205 (CRC), SW837 (CRC), FaDu (SCCHN), and SCC25 (SCCHN), the half-maximal inhibitory concentration (IC<sub>50</sub>) was measured. The oncolytic potential of ONCR-157 or ONCR-159 compared to the starting joint deleted virus ONCR-125 was not altered (Figure 4B). Furthermore, based on these *in vitro* IC<sub>50</sub> values, the UL37 R2 domain mutation did not impact oncolytic activity *in vitro*.

#### UL37 R2 Mutation Does Not Affect *In Vivo* Viral Spread or Anti-Tumor Activity

Mutant UL37 was associated with a small plaque-size phenotype;<sup>15</sup> therefore, we tested whether the mutations introduced into the R2 domain of UL37 in ONCR-159 would compromise its ability to infect tumor cells *in vivo* and to mediate anti-tumor responses. BALB/c mice bearing oHSV-1 sensitive A20 lymphoma subcutaneous tumors were administered a single IT dose ( $3 \times 10^6$  plaque forming units [PFU]) of either ONCR-157 or ONCR-159. Tumors were harvested at 24, 48, and 72 h post dose, formalin fixed, and examined for HSV-1 antigen by immunohistochemistry (Figure 5A). HSV-1 positively stained cells were generally noted across samples, with the most robust immunoreactivity noted at 48 h post-dose. HSV-1 immunoreactivity was similar and not significantly different for ONCR-157 versus ONCR-159.

Next, the anti-tumor activity of ONCR-157 and ONCR-159 was evaluated in the A20 tumor model after 3 IT doses of ONCR-125, ONCR-

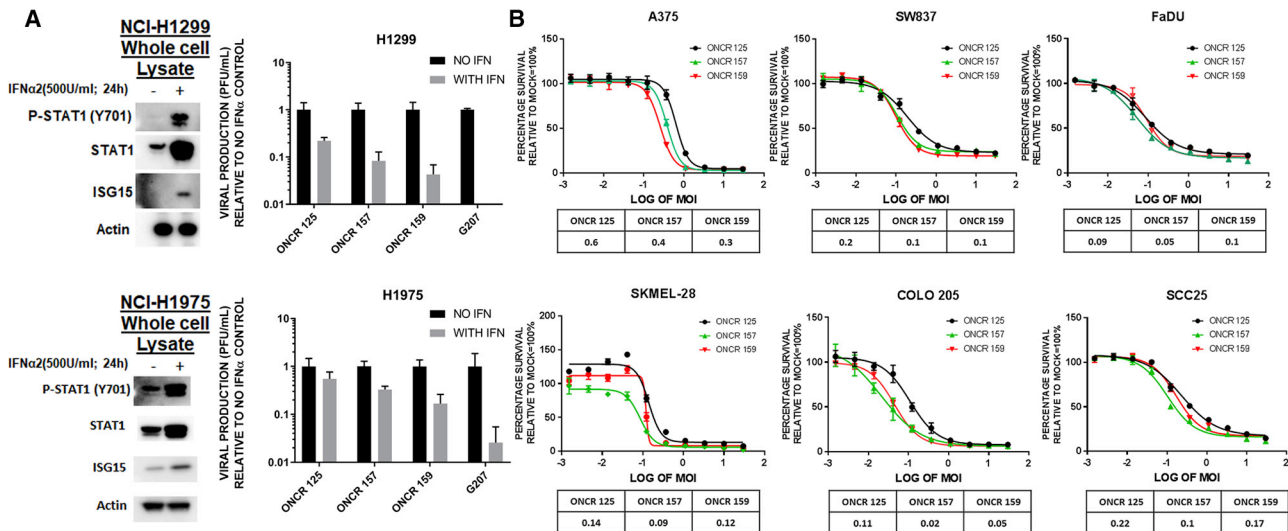

**Figure 4. The Sum of All Modifications of ONCR-159 Does Not Perturb Oncolytic Efficacy and IFN- $\alpha$  Resistance *In Vitro***

In (A), H1299 and H1975 cells are shown in the upper and lower panels, respectively. Within each upper and lower panel, IFN pretreatment western blots for p-STAT1 and ISG15 are shown on the left and normalized plaque titer yields for mock or pretreated cells are shown on the right. (B) IC<sub>50</sub> traces for the 3 vectors are depicted in (A) for the A375, SW837, FaDU, SKMEL-28, COLO-205, and SCC25 cells. IC<sub>50</sub> values are shown in tabular format below the traces. IFN, interferon; MOI, multiplicity of infection.

157, or ONCR-159 ( $3 \times 10^5$  PFU) administered on days 1, 4, and 7. All oHSVs were similarly efficacious compared to PBS control, resulting in significant tumor growth inhibition or tumor regressions (Figures 5B and 5C; Table 2). Similar results were obtained from 2 other mouse syngeneic tumor models (Figure S10; Table 2). Taken together, these results suggest that UL37 R2 mutation does not negatively affect *in vivo* antigen spread or anti-tumor activity of ONCR-159.

#### Systemic Exposure of ONCR-159 Is Well Tolerated in HSV-1 Permissive Mice

ONCR-159 base vector has been primarily designed for the purpose of engineering armed oncolytic HSV-1 for the treatment of subcutaneous and visceral lesions. Repeat IT injections of subcutaneous tumors were well tolerated at dose levels up to  $6 \times 10^6$  PFU/injection, as shown by the continuous body weight increase in these mice and absence of lethality (data not shown). However, the duration of these studies was short (30 days maximum) due to the observed tumor burden in the control arm group. ONCR-159 exposure was limited to the injected tumor, as shown by qPCR to detect HSV-1 genome (Figure S9). Therefore, dedicated safety studies were performed to compare the tolerability of intravenous and intrahepatic injections of ONCR-159 and its originating wild-type KOS strain. These studies were conducted using the BALB/c mouse strain that is known to be permissive to HSV-1.<sup>34,35</sup> A single administration of  $5 \times 10^6$  PFU KOS in 8 mice recapitulated the known toxicities associated with wild-type HSV-1 infection. Intravenous dosing with KOS at  $5 \times 10^6$  PFU was poorly tolerated, with most animals sacrificed in a moribund state between days 8 to 10. Clinical observations included emaciation, tachypnea, tremors, dehydration, hunched posture, impaired movement, and hind limb paralysis. Multifocal gliosis, often associ-

ated with a small number of individual necrotic, possibly neuron, cells, and perivascular lymphohistiocytic inflammation in the brainstem, were observed in animals surviving until scheduled sacrifice. Since female mice were shown to be more sensitive to KOS, a follow-up study investigating ONCR-159 used only females. Intravenous administration of ONCR-159 ( $1 \times 10^7$  PFU) administered 3 times weekly ( $3 \times 10^7$  PFU in total) was shown to be well tolerated with female mice ( $n = 4$ ) living without any notable clinical observation until scheduled sacrifice. No pathologically significant macroscopic or microscopic findings were observed. Intrahepatic injection in BALB/c mice were also performed to evaluate the potential for ONCR-159 vector for intralesional treatment of metastatic disease in the liver. All 4 females survived intrahepatic injection of  $1 \times 10^6$  PFU KOS and  $1 \times 10^7$  PFU of ONCR-159 until scheduled sacrifice on day 8, but 2 of the 4 animals dosed with KOS developed clinical symptoms, including hind limb paralysis, convulsion, and dyspnea. No clinical observation was noted in the ONCR-159 treated group. Histological findings were limited to the liver and 1 or 2 foci of hepatocellular necrosis found in close association with local inflammation, likely a consequence of the passage of the injection needle. These data indicate that in an HSV-1 permissive mouse model in which intravenous or intrahepatic KOS leads to neuropathy, the miRNA attenuation and UL37 mutations improved the tolerability of ONCR-159 and protected the mice from HSV-1 induced neuropathy.

#### DISCUSSION

First generation oncolytic vectors included deletions of type I IFN resistance genes, such as ICP34.5 or genes that enable replication in quiescent cells such as ribonucleotide reductase, in order to attenuate viral replication in normal cells.<sup>36</sup> Although groundbreaking, these



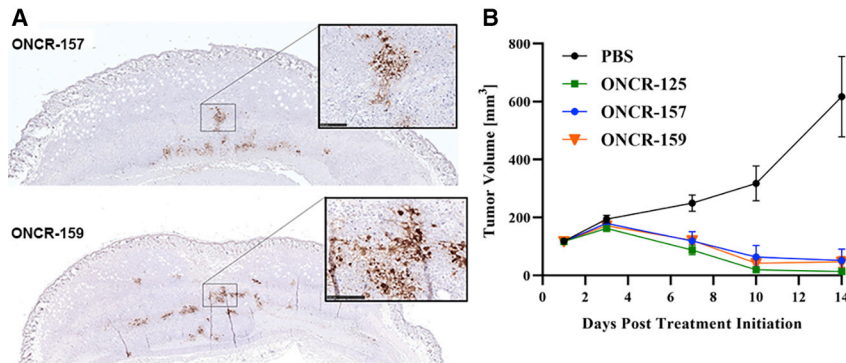

**Figure 5. UL37 Mutation Does Not Affect *In Vivo* Antigen Spread or Anti-Tumor Efficacy**

(A) A single  $3 \times 10^5$  PFU IT dose of ONCR-157 or ONCR-159 was administered to established A20 subcutaneous tumors. Formalin-fixed tumors were analyzed at various time points after dosing for viral antigen using a polyclonal anti-HSV-1 sera. Images represent 48 h post-dose. Insets are magnifications of positively stained regions. (B) *In vivo* efficacy of ONCR-157 and ONCR-159 in the A20 syngeneic tumor model. Tumor volume curves ONCR-125, ONCR-157, and ONCR-159 differed significantly from that of PBS ( $p \leq 0.0001$  in all cases, by two-way ANOVA). Differences between ONCR-125, ONCR-157, and ONCR-159 curves were not significant. (B) Longitudinal group mean tumor volume curves after IT administration of PBS or  $3 \times 10^5$  PFU of ONCR-125, ONCR-157, or ONCR-159. Dosing occurred on days 1, 4, and 7;  $n = 10$  mice/group. IT, intratumoral; PBS, phosphate buffered saline; PFU, plaque forming units.

vectors showed limited efficacy in the clinic, possibly from the attenuation of replication in tumors with residual intrinsic or extrinsic (from myeloid stromal cells) IFN signaling. The central assumption underlying these viral attenuation approaches was that tumor cells were generally defective for IFN response and/or that the majority of the cells within a tumor were dependent on nucleotide pools for proliferation or DNA repair. However, it is known that a majority of cells in a typical tumor, including tumor initiating cells, are quiescent and that many tumor cells express IFN or are, by default, in an antiviral state.<sup>1-4</sup> In some cases, this results from the constitutive expression of type I IFN downstream of ADAR1 for example, or in others, from the constitutive expression of ISGs.<sup>13,14</sup> Here, we show that our vector replicates even in the presence of excessive IFN- $\alpha$ , whereas the well-established ICP34.5 deleted oHSV vector, G207, does not. These *in vitro* results suggest higher potency and may result in greater *in vivo* efficacy in tumor models and patients.

To increase tumor-selective viral replication, we took advantage of the nearly general loss of expression of tissue-specific miRNA in cancer and inserted miR-T elements that are complementary to highly expressed and RISC-loaded cell-type-specific miRNA to restrict viral replication to cancer cells. This strategy has been successfully applied to gene therapy vectors or first generation oHSVs.<sup>18,20,37</sup> However, these vectors typically contained few miRNAs or were well tolerated in their unmodified state. Here, we have expanded this paradigm to include many tissues and cell types specific miR-T sequences in the context of a more potent vector that we have shown to be IFN- $\alpha$  resistant. Specifically, we extensively profiled miRNA and selected 10 miRNA candidates with high differential expression in tumor and normal tissue. Further, we have developed an *in silico* design pipeline to produce miR-Ts that are highly susceptible to Ago2 cleavage resulting from efforts to reduce RNA secondary structure, and we have eliminated seed targets for known miRNAs that are expressed in tumor cells (OncomiRs). These cassettes are highly effective *in vitro* (Figure 3), and any of the miRNAs included in these cassettes are capable of strongly, if not completely, inhibiting viral production assessed by plaque titer. If

we consider the case of neuronal tissues, miR-124-3p, miR-128-3p, and miR-137-3p are expected to be highly expressed in all differentiated neurons and loaded in the RISC prior to the infection; any one of these miRNAs would be repressing ONCR-159 at the onset of infection. Considering this possibility, the conservative interpretation of the strong attenuation mediated by single mimics (Figure 3C) suggests that this outcome might be an underestimate of the actual repression that would be observed in primary cortical/peripheral neurons where multiple RISC loaded miRNAs (miR-124-3p, miR-128-3p, miR-137-3p) would be repressing multiple essential HSV-1 genes simultaneously. Overall, in addition to the focus on the nervous system, ONCR-159 was engineered to respond to miRNAs specific for smooth/cardiac/skeletal muscle and liver to protect those tissues from potentially high viral production during tumor lysis. Data from high dose IV infusion shows that this strategy protects normal tissues from undesired viral replication, as is evidenced by survival relative to HSV-1 KOS and the lack of toxicity. This vector is also well tolerated when directly injected in the liver, expanding the potential clinical applications to hepatic lesions.

Escape from the mechanisms driving tumor versus normal tissue selectivity is a concern for any replication competent vector. In consideration of this, we engineered tissue-specific redundancy into the miR-T platform to minimize the probability of selecting oHSV mutants that may have mutations in these cassettes. We have built redundancy into each cassette with multiple elements of each miR-T per cassette. For the attenuation specifically in the nervous system miR-Ts for miRNAs expressed in neurons were built into all 3 essential gene cassettes and in ICP34.5 (Figure 3B). ONCR-159 cassettes were stable during the production of this viral vector as assessed by next-generation sequencing, and no evidence of loss or mutagenesis during scaling or production of an armed vector derived from ONCR-159 was observed.

The retrograde transport from the periphery into the CNS is a general concern with HSV-1 vectors, especially when they are delivered at a

**Table 2. Summary of *In Vivo* Anti-Tumor Activity of ONCR-157 and ONCR-159**

| Model    | Treatment | Dose (PFU)      | Anti-Tumor Efficacy |       |               |
|----------|-----------|-----------------|---------------------|-------|---------------|
|          |           |                 | % RR (PR; CR)       | % TGI | p Value       |
| A20      | PBS       | –               | 0 (0;0)             | –     | –             |
|          | ONCR-157  | $3 \times 10^5$ | 90 (1;8)            | 86    | $\leq 0.0001$ |
|          | ONCR-159  | $3 \times 10^5$ | 70 (4;3)            | 86    | $\leq 0.0001$ |
| MC38     | PBS       | –               | 0 (0;0)             | –     | –             |
|          | ONCR-157  | $3 \times 10^6$ | 0 (0;0)             | 39    | 0.04          |
|          | ONCR-159  | $3 \times 10^6$ | 10 (1;0)            | 71    | $\leq 0.0001$ |
| B16F10N1 | PBS       | –               | 0 (0;0)             | –     | –             |
|          | ONCR-157  | $6 \times 10^6$ | 25 (2;0)            | 87    | $\leq 0.0001$ |
|          | ONCR-159  | $6 \times 10^6$ | 63 (5;0)            | 97    | $\leq 0.0001$ |

–, not assessed; CR, complete response; PBS, phosphate buffered saline; PFU, plaque forming units; PR, partial regression; RR, response rate (PR + CR); TGI, tumor growth inhibition, relative to last day most of PBS control group was still present (day 17 for A20 and MC38, and day 12 for B16F10N1). PR and CR values are based on the entire duration of the study. Animals (n = 10 per group for A20 and MC38, n = 8 per group for B16F10N1) were dosed intratumorally on days 1, 4, and 7, in which day 1 is considered the 1<sup>st</sup> day of dosing. For the statistical analysis of efficacy data, a mixed linear model was used for A20 and MC38 until day 21 and B16F10N1 until day 12. p values are in reference to the PBS control. Analyses were performed using two-way ANOVA and Tukey's multiple comparisons post-hoc test.

high intratumorally dose. We made use of the series of mutations in the HSV-1 UL37 gene described by Richards et al.<sup>15</sup> that completely ablates retrograde transport into the CNS in the context of a corneal scratch model and incorporated these mutations to enhance the safety strategy of ONCR-159. This additional modification adds further redundancy to the miRNA attenuation platform and are expected to prevent migration of ONCR-159 into the CNS.

Despite the extensive modification of our oHSV vector, we observed efficient oncolysis *in vitro* in a panel of human cancer cell lines (Figure 4B), indicating that these modifications did not disrupt essential aspects of the viral life cycle or its oncolytic activity. This data is reinforced by antigen spread and antitumor activity observed *in vivo* after IT administration in tumors established from murine tumor cell lines ranging in HSV-1 sensitivity from completely sensitive (A20, Figures 5B and 5C) to refractory (B16F10N1, Figure S10B). The antitumor efficacy in combination with the fact that this vector is well tolerated at high doses when administered via multiple routes, warrants the development of this vector for clinical use. However, in studies with contralateral tumors, we observed modest activity at best, which serves as a rationale for the selection and inclusion of the immunomodulatory payloads. This vector can accommodate >20 kb of payload cassettes, differentiating this oncolytic viral vector from other viral vectors currently in development. This large cargo capacity permits this vector to be armed by multiple transgenes, far beyond the capacity observed for other HSV-1 oncolytic viruses, or other smaller RNA viruses. The selection of immunomodulatory payloads is currently underway and will provide a vehicle for their expression to enhance the immune stimulatory potential of the virus.

In conclusion, ONCR-159 and vectors that are fully armed with immunomodulatory payloads will provide potent therapeutics to improve outcomes for patients with advanced disease.

## MATERIALS AND METHODS

### Cell Lines and Oncolytic Viruses

HEK293T (CRL-3216, ATCC Manassas, VA, USA), A253 (HTB-41, ATCC), Vero (CCL-81, ATCC), A375 (CRL 1619, ATCC), and SKMEL-28 (HTB-72, ATCC) cells were grown in high-glucose DMEM supplemented with 10% fetal bovine serum (FBS) and 1% penicillin/streptomycin at 37°C, 100% humidity, and 5% CO<sub>2</sub>. COLO 205 (CCL-222, ATCC), NCI-H1299, NCI-1975, and MC38 cells were grown in RPMI-1640 supplemented with 10% FBS and 1% penicillin/streptomycin at 37°C, 100% humidity, and 5% CO<sub>2</sub>. SW637 cells (CCL-235, ATCC) were grown in Leibovitz L-15 supplemented with 10% FBS and 1% penicillin/streptomycin at 37°C, 100% humidity, and 5% CO<sub>2</sub>. FaDu (HTB-43, ATCC) cells were grown in EMEM supplemented with 10% FBS and 1% penicillin/streptomycin at 37°C, 100% humidity, and 5% CO<sub>2</sub>. SCC25 (CRL-1628) cells were grown in DMEM+F12 supplemented with 10% FBS and 1% penicillin/streptomycin at 37°C, 100% humidity, and 5% CO<sub>2</sub>. A20 (TIB-208, ATCC) cells were maintained *in vitro* as a suspension culture in RPMI-1640 medium supplemented with 10% heat-inactivated FBS, 1% penicillin/streptomycin, and 0.05 mM β-mercapto-ethanol. Cell cultures were incubated in a humidified atmosphere with 5% CO<sub>2</sub> at 37°C and sub-cultured once cell density reached  $1 \times 10^6$  cells/mL. B16F10 (CRL-6475, ATCC) cells were stably expressed to include HSV-1 entry receptor Nectin 1 (B16F10N1) and grown in DMEM supplemented with 10% FBS and 1% penicillin/streptomycin at 37°C, 0.75 μg/mL puromycin at 100% humidity, and 5% CO<sub>2</sub>.

All genetic alterations leading to ONCR-157, and mONCR-159 were conducted on their respective full-length genome cloned in bacterial artificial chromosome (BAC). All modifications were confirmed by Sanger sequencing. The excision of the BAC vector sequence including the ori-replication and the antibiotic selection marker, was achieved by Cre *loxP* recombination and confirmed by X-gal staining of ONCR-157- or ONCR-159-infected cells. BAC-removed viruses were plaque purified in the Vero-SF (ATCC CCL-81.5) cell line prior to expansion of the viruses in Vero-SF cells, purification by centrifugation, determination of titer, and vialing.

### Transient Transfection for siRNA Screen on MiniMax

A253 cells were seeded at  $4 \times 10^4$  cells/well in 48-well plates and incubated for 24 h in a CO<sub>2</sub> incubator. On target plus siRNA (GE Healthcare Dharmacon, Lafayette, CO, USA) were transfected using RNAiMax (Invitrogen, Thermo Fisher, Waltham, MA) according to manufacturer's protocol at a final concentration of 6.7 nM in biological and technical triplicate. Each experiment also included a negative siRNA control #1 (GE #D-001810-01-05), a non-targeting sequence molecule that serves as a baseline for evaluation of the control and experimental siRNA on target gene expression.

### Transient Transfection for Dual-Luciferase Assay

HEK293T cells were seeded at  $1 \times 10^4$  cells/well in opaque 96-well plates and incubated for 24 h at 37°C in a CO<sub>2</sub> incubator. mirVana miRNA mimics were co-transfected in triplicate with psiCHECK-2 (Promega, C8021) vectors using Lipofectamine 2000 (Invitrogen, Thermo Fisher, 11668-019) according to manufacturer's protocol at the indicated final concentration for the mimic and 50 ng of plasmid DNA for the vector containing the miR-T cassette, in biological and technical triplicate. Each experiment also included a negative mirVana mimic miRNA control #1 (Invitrogen, Thermo Fisher, 4464058), a random sequence of miRNA mimic molecule that serves as a baseline for evaluation of the transcriptional regulation control and experimental miRNA mimic on target gene expression.<sup>38</sup> A control negative (Neg) mimic with little or no off-target effect was provided by the manufacturer.

### Dual-Luciferase Assays

To control for transfection efficiency, we used firefly luciferase (fluc) expression to normalize for *Renilla* luciferase (rluc) expression. The dual-luciferase assay was performed with the SpectraMax DuoLuc Reporter Assay Kit (Molecular Devices, San Jose, CA, USA, R8361). All reagents were prepared as described by the manufacturer. Twenty microliters of 1X passive lysis buffer was added to each well for 15 min at 250 rpm on a plate shaker. Using the SpectraMax i3x Dual-Luc injector cartridge, automated injection of 100 µL of the fluc reagent was added to each test sample, with a 2 s equilibration time and measurement of luminescence with a 5 s integration time, followed by addition of 100 µL of the rluc reagent and firefly quenching, 2 s equilibration time, and measurement of luminescence with a 5 s integration time. The data are represented as the ratio of firefly to *Renilla* luciferase activity (fluc/rluc). Fluc expression is controlled by the miR-T cassette, and rluc serves as the control for transfection efficiency. The data were normalized to the negative control (miR-T vector and negative mirVana mimic miRNA control #1, Invitrogen, Thermo Fisher, 4464058).

### Transient Transfection of miRNA Mimics for Virus Infection

A253 cells were seeded at  $4 \times 10^4$  cells/well in 48-well plates and incubated for 24 h in a CO<sub>2</sub> incubator. mirVanamiRNA mimics were transfected using RNAiMax (Invitrogen, Thermo Fisher) according to the manufacturer's protocol at a final concentration of 6.7 nM in biological and technical duplicate. Each experiment also included a negative mirVana mimic miRNA control #1 (Invitrogen, Thermo Fisher, 4464058), a random sequence miRNA mimic molecule that serves as a baseline for evaluation of the control and experimental miRNA mimic on target gene expression.<sup>38</sup> This mimic with a random sequence has been tested in human cell lines and does not produce any off-target effects. All mimic sequences are listed in [Table S6](#).

### Virus Infection

After 24 h post transfection, A253 cells were enumerated and infected with ONCR-159 (Lot 18-159-058) with a multiplicity of infection (MOI) of 0.1 in a final volume of 250 µL (in DMEM). Infection

was carried out in serum-free conditions with an absorption period of 1 h on a rocking platform. Plates were then incubated for a period of 3 days at 37°C in a CO<sub>2</sub> incubator. To measure plaque titer for each condition, we froze plates at -20°C and freeze/thawed them 3 times. After the final thaw, each supernatant was transferred to 1.5 mL Eppendorf tubes and briefly vortexed, followed by centrifugation at 3,500 RPM for 5 min to pellet cell debris. Ninety-six well S blocks (QIAGEN, Germantown, MD, USA) were used to serially dilute each condition with serum-free media across a -1 to -6 log dilution range.

### Virus Plaque Titer Assay

Vero cells were seeded in a 24-well format at  $1 \times 10^5$  cells/well. After 24 h, infectious particles recovered from supernatants collected from the virus infection were added to these cells. Each condition was analyzed in biological triplicate and technical duplicate in serum-free conditions with a 100 µL volume for an absorption period of 1 h on a rocking platform. Post-absorption, 400 µL of complete media was added to a final volume of 500 µL/well. After 20 h, each well was aspirated and replenished with 500 µL complete media containing 2% human serum. The assay was conducted for a period of 8 days. Wells were aspirated and stained with crystal violet solution. Discrete plaque forming colonies were counted manually  $\geq 5$ /well to determine ONCR-159 titer.

### Tissue RNA Extraction

Human tissue samples were obtained from Cooperative Human Tissue Network (University of Pennsylvania, Vanderbilt University, The Ohio State University, University of Virginia, Duke University and Nationwide Children's Hospital). Additional tissue samples were obtained from BioIVT (Westbury, NY, USA) and DxBio (San Diego, CA, USA). Tissue metadata is listed in [Table S3](#). Tissues were rapidly snap frozen after harvest and were histologically characterized with respect to tissue composition.<sup>39</sup> Subcellular distribution of these miRNAs in tissue has been characterized utilizing miRNA *in situ* hybridization, and references for these studies have been included in the appendix ([Table S7](#)). Twenty milligram sections were cut by scalpel and placed in a 1.5 mL Eppendorf tube and stored at -80°C.

For RNA isolation, each tissue sample was thawed on ice. Qiazol (QIAGEN) and chloroform were chilled on ice prior to use. Qiazol (700 µL) was added to each tube containing a tissue section, and disposable RNase-free pestles were used to homogenize the tissue. Subsequently, 140 µL of chloroform was added and centrifuged at maximum speed for 10 min. The upper aqueous phase (300 µL) was transferred to a new tube, and 450 µL of 100% ethanol at room temperature was then added and mixed. Approximately 700 µL of this mixture was transferred to a QIAGEN miRneasy column. The remaining steps in this process were performed according to the manufacturer's protocol (QIAGEN miRneasy Kit, 217004). Each RNA sample in this report was analyzed by a NanoDrop spectrophotometer (Thermo Fisher Scientific, Wilmington, MA, USA) to confirm sample quality as recommended by nCounter miRNA Expression Assay User Manual.

### nanoString Human miRNA Profiling

miRNA profiling using nanoString (NanoString Technologies, Seattle, WA, USA) was performed exactly as per the manufacturer protocol (nCounter miRNA Expression Assay User Manual). Each total RNA sample was analyzed in a separate multiplexed reaction. Briefly, unique oligonucleotide tags are ligated onto miRNAs, allowing short RNAs to be detected without amplification. Multiplexed hybridization of specific tags to their target miRNA, with a biotin capture probe and a unique reporter probe forming a Target-Probe complex being hybridized in solution. After hybridization, the hybridization mixture containing the target/probe complexes binds to magnetic beads complementary to sequences on the capture probe. Excess probes without a complementary target were removed using a two-step magnetic bead-based purification. Final purified target/probe complexes are eluted off the beads, immobilized, and aligned to the cartridge. Barcodes were read on a digital analyzer in a high-throughput automated fashion for up to 800 individual miRNAs per sample. Quantification was performed on a nanoString SPRINT instrument with the nanoString Human miRNA Panel 3.0.

All individual tissue samples were analyzed with the human miRv3 panel on the nanoString Sprint instrument. Sample preparation was performed as per the manufacturer recommendations, and the raw data quality control was conducted. Raw data were checked using the nSolver 4.0 software to ensure that (1) binding density was appropriate, (2) ligation controls were in the appropriate range, and (3) positive hybridization controls were correct. These analyses were performed with nSolver 4.0, and raw data were exported.

Datasets were normalized in nSolver by background thresholding the geometric mean across the negative controls, any samples outside of the 0.3 to 3 normalization factor range were omitted. Subsequently, normalization to the geometric mean of the positive controls was conducted to account for hybridization efficiency and was scaled to all endogenous and housekeeping genes to 1,000,000 total counts of the lane. Any samples for which the normalization factors were outside of the 0.1 to 10 range were omitted.

Lastly, every miRNA below 0.1% was excluded from analysis as it has been established in the field.<sup>40</sup> Ratios between the mean of the normal group to the malignant group were calculated. Individual candidate miRNAs were then compared sample-by-sample, and an unpaired two-tailed t test was applied. A heatmap summary of the miRNA ratios was generated using Broad Institute's <https://software.broadinstitute.org/morpheus/> Morpheus software.

### Cell Lines and Viral Infection for Interferon Sensitivity

Cells ( $1.0 \times 10^5$ ) in complete media supplemented with 5,000 IU/mL of recombinant human IFN $\alpha$ -2a per well were seeded onto 24-well format multiwell tissue culture plates.<sup>41</sup> Each cell type was also seeded in complete media without IFN $\alpha$ -2a. On the following day, total media was aspirated out and substituted with 100  $\mu$ L of OptiMEM containing ONCR-177 and G207 (each 0.03 MOI). The cells were treated with either mock or ONCR-177 or G207. Viruses were allowed to

adsorb for a period of 60 min followed by substitution with 400  $\mu$ L of complete media with and without IFN $\alpha$ -2a at 5,000 IU/mL 48 h post infection. Cells and conditioned media were collected and frozen at  $-80^\circ\text{C}$ , until the viral titer was determined by virus plaque titer assay.

### Western Blot Protocol

Cells plated at  $2 \times 10^5$  cells/well/2 mL media were plated in a 6-well plate the night before IFN- $\alpha$  treatment as described. After 30 min, media were removed, and cells were lysed and collected using 150  $\mu$ L 1X NuPAGE LDS Sample Buffer (Invitrogen, Thermo Fisher). Lysates were stored at  $-80^\circ\text{C}$ . Lysate samples were directly sonicated with a microtip at 20% amplitude 3X for 5 s before being incubated at  $95^\circ\text{C}$  for 5 min. Lysate samples (10  $\mu$ L) were electrophoresed on a NuPAGE 4%–12% Bis-Tris gel with MOPS buffer at 150 V for 70 min and transferred to a membrane using an iBlot2 gel transfer system. The membrane was blocked with 5% milk in PBS-T, incubated with primary antibodies overnight at 1:1,000 dilution at  $4^\circ\text{C}$ , followed by secondary antibody incubations at 1:10,000 dilution for 60 min at  $25^\circ\text{C}$ . Antibody binding was detected using Immobilon Western Chemiluminescent HRP Substrate and imaged using Protein Simple Fluor Chem R. The following antibodies were used for western blot analysis: Stat1 (#14994), Phospho-Stat1 Tyr701 (#9167), ISG15 (#2758) from Cell Signaling Technologies (Danvers, MA, USA), and beta actin HRP (#ab20272) from Abcam (Cambridge, MA, USA).

### Oncolysis and *In Vitro* Viability Assays

The oncolytic activity of ONCR vectors was determined by calculating the  $\text{IC}_{50}$  value for each virus in each cell line. The  $\text{IC}_{50}$  is determined by the MOI, achieving the killing of 50% of the input cells 72 h after infection as compared to mock-treated cells and as determined by CellTiter-Glo assay. CellTiter-Glo (#G9242) was obtained from Promega Corporation (Madison, WI, USA). Annexin V red reagent (#4641) was purchased from Essen Bioscience (Sartorius, Bohemia, NY, USA).

Briefly, 10,000 cells were seeded in 96-well tissue culture plates in their recommended complete media followed by overnight incubation at  $37^\circ\text{C}$ , 5%  $\text{CO}_2$ . On the following day, culture medium was aspirated and replaced with 25  $\mu$ L freshly prepared serial diluted (1:3) virus (ONCR vectors) in OptiMEM-reduced serum media, starting from MOI = 30 (9 points of dilution and a blank control in quadruplicates). An adsorption step was carried out for 1 h at  $37^\circ\text{C}$ , 5%  $\text{CO}_2$ , by gentle rotating the multi-well plate on a shaker. After 1 h, 75  $\mu$ L of complete culture media was added. The next day media containing viral inoculum were aspirated and substituted with 100  $\mu$ L pre-warmed complete media.

*In vitro* viability assay was performed at 72 h post-infection by adding 100  $\mu$ L of CellTiter-Glo 2.0 reagent and equilibrating (shaking) the plate at room temperature for 30 min. Total luminescence (RLU) was measured in a plate reader (Molecular Devices, Spectramax i3X minimax imaging cytometer), and data were acquired by Softmax Pro v7.0.2 from Molecular Devices (San Jose, CA, USA).



Raw data acquired by Softmax Pro v7.0.2 were reduced to numbers with 3 decimal points only. The values were then converted to percentage survival relative to mock (100%).

$$\% \text{ survival relative to mock} = \left( \frac{100}{\text{average of RLU of mock treated well}} \right)$$

\* RLU of virus treated well

The values were graphed in GraphPad Software Prism 7.0 (San Diego, CA, USA) and analyzed using a non-linear sigmoidal plot with variable slope (asymmetric four-point linear regression) to generate IC<sub>50</sub> values.

### In Vivo Tumor Studies

#### Animal Care

Female BALB/c and C57BL/6 mice (Charles River Laboratories), 5 to 8 weeks of age, were cared for in accordance with the "Guide for the Care and Use of Laboratory Animals." All protocols were approved by an Institutional Animal Care and Use Committee. Animals had *ad libitum* access to sterile pelleted feed and reverse osmosis-purified water and were maintained on a 12:12-h light:dark cycle with access to environmental enrichment opportunities.

#### A20 Syngeneic Tumor Model

A20 tumor cells were maintained *in vitro* as a suspension culture in RPMI-1640 medium supplemented with 10% heat-inactivated FBS, 1% penicillin/streptomycin, and 0.05 mM β-mercapto-ethanol. Cell cultures were incubated in a humidified atmosphere with 5% CO<sub>2</sub> at 37°C and sub-cultured once cell density reached 1 × 10<sup>6</sup> cells/mL. BALB/c female mice that were 8 weeks of age weighing approximately 18 to 22 lbs were ordered under Oncorus Animal Protocol 001-2017. Animals were housed up to 5 mice per cage and received food and water *ad libitum* throughout the course of this study. Prior to tumor cell implantation, all mice were identified by ear-tag and tumor implantation sites were shaved. Each animal was inoculated subcutaneously with ≥90% viable 5 × 10<sup>6</sup> A20 cells (in 0.1 mL in serum-free Dulbecco's Phosphate Buffered Saline [DPBS] per implant) on the flank (0.1 mL in serum-free DPBS) for tumor development. For HSV-1 antigen spread studies, BALB/c mice with ~50 mm<sup>3</sup> A20 subcutaneous tumors were administered either ONCR157 or ONCR-159 intratumorally at 3 × 10<sup>6</sup> PFU. Tumors were harvested at 24, 48, or 72 h post-treatment, formalin-fixed, paraffin embedded, and sectioned into slides. Slides were stained for HSV-1 expression using an anti-HSV-1 rabbit polyclonal antibody APA 3027 AAK (Biocare Medical, Pacheco, CA, USA).

#### MC38 Syngeneic Tumor Model

MC38 tumor cells were cultured as a monolayer *in vitro* in DMEM supplemented with 10% heat-inactivated FBS and 1% penicillin/streptomycin and maintained in a humidified atmosphere with 5% CO<sub>2</sub> at 37°C. Cells were sub-cultured at 80% confluency. C57BL/6 female mice that were 8 weeks of age weighing approximately 18 to 22 lbs were ordered under Oncorus Animal Protocol 001-2017. Animals were housed up to 5 mice per cage and received food and water *ad*

*libitum* throughout the course of these studies. Prior to tumor cell implantation, all mice were identified by a unique ear tag and tumor implantation sites shaved. Each animal was inoculated subcutaneously with ≥90% viable 5 × 10<sup>5</sup> MC38 cells (in 0.1 mL in serum-free DPBS per implant) on the flank (0.1 mL in serum-free DPBS) for tumor development.

#### B16F10 Tumor Model

To generate a B16F10 cell line that stably expresses HSV-1 entry receptor Nectin 1 (B16F10N1), we transduced B16F10 cells with lentivirus-pCDH-Nectin1 and clones selected in the presence of 0.75 μg/mL puromycin dihydrochloride. B16F10N1 tumor cells were maintained *in vitro* as a monolayer cell culture in DMEM medium supplemented with 10% heat-inactivated FBS, 1% penicillin/streptomycin, and 0.75 μg/mL puromycin. Cell cultures were incubated in a humidified atmosphere with 5% CO<sub>2</sub> at 37°C and sub-cultured once at 80% confluency. C57BL/6 female mice that were 8 weeks of age weighing approximately 18 to 22 lbs were ordered under Oncorus Animal Protocol 001-2017. Animals were housed up to 5 mice per cage and received food and water *ad libitum* throughout the course of this study. Prior to tumor cell implantation, all mice were identified by a unique ear tag and tumor implantation sites were shaved. Each animal was inoculated subcutaneously with ≥90% viable 5 × 10<sup>5</sup> B16F10N1 cells (in 0.1 mL in serum-free DPBS per implant) on the flank (0.1 mL in serum-free DPBS) for tumor development.

In all *in vivo* studies, mice were lightly anesthetized with 5% isoflurane before implantation to ensure subcutaneous delivery of cells. Any animals harboring tumors growing intradermally (ID) or intramuscularly (i.m.) or with ulceration/necrosis were not enrolled into the study. Randomization, enrollment, and initiation of treatment began when an adequate number of mice with properly sized tumors were identified (median right flank tumor volume of approximately 100 ± 25 mm<sup>3</sup> for studies in A20 and M38 tumor models and median right flank tumor volume of approximately 80 ± 30 mm<sup>3</sup> for a study in B16F10N1 melanoma model). Animals were matched based on tumor volume size and randomly placed into groups. Doses were formulated according to the following formula:

$$V_S = V \times \frac{D}{C_S \times V_I}, V_{DPBS} = V - V_S$$

where V<sub>S</sub> is volume of virus stock solution (μL), V is volume of virus preparation being prepared for dosing (μL), D is dose in PFU, C<sub>S</sub> is the concentration of the virus stock, and V<sub>I</sub> is volume of injection.

All viruses were formulated immediately before dosing and kept on ice until ready to be injected. A pre-specified volume of virus aliquot (V<sub>S</sub>) was diluted in a volume of sterile DPBS (V<sub>DPBS</sub>) and gently mixed. The injection of virus into the tumor tissue was performed using a sterile 31G insulin needle (bevel up) attached to a sterile syringe. Doses were administered as a single injection of 25 μL per tumor per dosing date. Mice received 3 IT injections of either PBS, ONCR-157, or ONCR-159 on days 1, 4, and 7.

Animals had *ad libitum* access to sterile pelleted feed and reverse-osmosis-purified water and were maintained on a 12:12-h light:dark cycle with access to environmental enrichment. Throughout the course of the efficacy study, the animals were monitored daily for adverse events and body weight was recorded twice per week. Tumor volumes, measured at least 2 times per week, were calculated using the following formula:  $TV = a \times b^2/c$ , where “a” is tumor length and “b” is tumor width. Mice were humanely euthanized once the combined tumor burden reached the endpoint value of  $>2,000 \text{ mm}^3$ . All animal protocols were approved by the Oncorus Institutional Animal Care and Use Committee (IACUC) and were performed in accordance with IACUC regulations.

### Safety Studies

All safety studies used 5- to 8-week-old BALB/c mice (Charles River Laboratories, Wilmington, MA, USA). In one study, animals (4 per sex) were given a single intravenous dose of KOS at  $5 \times 10^6$  or  $1 \times 10^7$  PFU. Animals were thereafter followed or evaluated for clinical observations, body weight, and food consumption until study takedown on days 8 or 29 post-dose, upon which tissues (brain, liver, spleen, lungs, kidneys, and heart) were evaluated for pathology. In another study, repeat intravenous doses (on days 1, 8, and 15) of ONCR-159 at  $1 \times 10^7$  PFU were administered. Animals were followed as described for the previous study, and take downs were on days 8 or 30, upon which tissues (brain, liver, spleen, lungs, kidneys, and heart) were evaluated for pathology. Finally, a cohort (4 female BALB/c mice per treatment group) was administered a single dose of vehicle control, KOS ( $1 \times 10^6$  PFU), or ONCR-159 ( $1 \times 10^7$  PFU) into the left lobe of the liver (intra-hepatic [IH]) and thereafter followed or evaluated for clinical observations, clinical chemistry, body weight, and food consumption, until study takedown on days 8. Tissues (brain, liver, spleen, lung, kidney, heart, and trigeminal ganglia) were subsequently evaluated for pathology.

### Statistical Analysis

The *in vitro* data are presented as the mean  $\pm$  standard deviation (SD). The *in vivo* data are presented as the mean  $\pm$  standard error of the mean (SEM). The statistical tests for data are justified and the data meets the assumptions of the test and was performed using GraphPad Prism version 8.01 for Windows (GraphPad Software, La Jolla, CA, USA; <https://www.graphpad.com/>). Significance between specific datasets is described in the respective figure legends.

### SUPPLEMENTAL INFORMATION

Supplemental Information can be found online at <https://doi.org/10.1016/j.omto.2020.08.004>.

### AUTHOR CONTRIBUTIONS

Conceptualization, E.M.K., M.H.F., J.C.G., B.B.H., C.Q., and L.L.; Methodology, E.M.K., T.F., P.G., J.L., A.D., J.H., J.B., P.B., C.G., D.W.; Software, E.M.K.; Validation, E.M.K., T.F., and L.L.; Formal Analysis, E.M.K., T.F., A.D., A.D.A., J.J., D.D., B.B.H., J.B.R., C.Q., L.L.; Writing – Review & Editing, E.M.K., L.L., B.B.H., and C.Q.; Su-

pervision, E.M.K., B.B.H., L.L., and C.Q.; Project Administration, E.M.K., L.L., B.B.H., and C.Q.

### CONFLICTS OF INTEREST

E.M.K., T.F., P.G., J.L., A.D., J.H., J.B., P.B. (at the time the study was conducted), C.G. (at the time the study was conducted), D.W., A.D.A., J.J., M.H.F. (at the time the study was conducted), B.B.H., C.Q., and L.L. are all employees of Oncorus. D.D. and J.B.R. are paid consultants for Oncorus, and J.C.G. is Oncorus cofounder, paid consultant, and shareholder. All other authors declare no competing interests.

### ACKNOWLEDGMENTS

This study was sponsored by Oncorus, Inc. The authors would like to acknowledge Sofie Denies for expert statistical analysis and Michael Cristini and Jim Markert for providing G207 for comparison. The authors also wish to thank Chastity Bradley, PhD, of FBL ClinWriters for her editorial review of the manuscript and assistance with manuscript submission.

### REFERENCES

- Diallo, J.S., Le Boeuf, F., Lai, F., Cox, J., Vaha-Koskela, M., Abdelbary, H., MacTavish, H., Waite, K., Falls, T., Wang, J., et al. (2010). A high-throughput pharmacoviral approach identifies novel oncolytic virus sensitizers. *Mol. Ther.* *18*, 1123–1129.
- Felt, S.A., Droby, G.N., and Grdzlishvili, V.Z. (2017). Ruxolitinib and Polycation Combination Treatment Overcomes Multiple Mechanisms of Resistance of Pancreatic Cancer Cells to Oncolytic Vesicular Stomatitis Virus. *J. Virol.* *91*, e00461–17.
- Liu, Y.P., Suksanpaisan, L., Steele, M.B., Russell, S.J., and Peng, K.W. (2013). Induction of antiviral genes by the tumor microenvironment confers resistance to virotherapy. *Sci. Rep.* *3*, 2375.
- Moerdyk-Schauwecker, M., Shah, N.R., Murphy, A.M., Hastie, E., Mukherjee, P., and Grdzlishvili, V.Z. (2013). Resistance of pancreatic cancer cells to oncolytic vesicular stomatitis virus: role of type I interferon signaling. *Virology* *436*, 221–234.
- Mineta, T., Rabkin, S.D., Yazaki, T., Hunter, W.D., and Martuza, R.L. (1995). Attenuated multi-mutated herpes simplex virus-1 for the treatment of malignant gliomas. *Nat. Med.* *1*, 938–943.
- Liu, B.L., Robinson, M., Han, Z.Q., Branston, R.H., English, C., Reay, P., McGrath, Y., Thomas, S.K., Thornton, M., Bullock, P., et al. (2003). ICP34.5 deleted herpes simplex virus with enhanced oncolytic, immune stimulating, and anti-tumour properties. *Gene Ther.* *10*, 292–303.
- He, B., Gross, M., and Roizman, B. (1997). The gamma(1)34.5 protein of herpes simplex virus 1 complexes with protein phosphatase 1alpha to dephosphorylate the alpha subunit of the eukaryotic translation initiation factor 2 and preclude the shutoff of protein synthesis by double-stranded RNA-activated protein kinase. *Proc. Natl. Acad. Sci. USA* *94*, 843–848.
- Manivanh, R., Mehrbach, J., Knipe, D.M., and Leib, D.A. (2017). Role of Herpes Simplex Virus 1  $\gamma$ 34.5 in the Regulation of IRF3 Signaling. *J. Virol.* *91*, e01156–17.
- Orvedahl, A., Alexander, D., Tallóczy, Z., Sun, Q., Wei, Y., Zhang, W., Burns, D., Leib, D.A., and Levine, B. (2007). HSV-1 ICP34.5 confers neurovirulence by targeting the Beclin 1 autophagy protein. *Cell Host Microbe* *1*, 23–35.
- Kesari, S., Lasner, T.M., Balsara, K.R., Randazzo, B.P., Lee, V.M., Trojanowski, J.Q., and Fraser, N.W. (1998). A neuroattenuated ICP34.5-deficient herpes simplex virus type 1 replicates in ependymal cells of the murine central nervous system. *J. Gen. Virol.* *79*, 525–536.
- Therapeutic Goods Administration Australian Government. (2016). Australian Public Assessment Report for Talimogene Laherparepvec. <https://www.tga.gov.au/sites/default/files/auspar-talimogene-laherparepvec-160531.pdf>.

12. Kambara, H., Saeki, Y., and Chiocca, E.A. (2005). Cyclophosphamide allows for in vivo dose reduction of a potent oncolytic virus. *Cancer Res.* *65*, 11255–11258.
13. Gannon, H.S., Zou, T., Kiessling, M.K., Gao, G.F., Cai, D., Choi, P.S., Ivan, A.P., Buchumenski, I., Berger, A.C., Goldstein, J.T., et al. (2018). Identification of ADAR1 adenosine deaminase dependency in a subset of cancer cells. *Nat. Commun.* *9*, 5450.
14. Ishizuka, J.J., Manguso, R.T., Cheruiyot, C.K., Bi, K., Panda, A., Iracheta-Velhe, A., Miller, B.C., Du, P.P., Yates, K.B., Dubrot, J., et al. (2019). Loss of ADAR1 in tumours overcomes resistance to immune checkpoint blockade. *Nature* *565*, 43–48.
15. Richards, A.L., Sollars, P.J., Pitts, J.D., Stults, A.M., Heldwein, E.E., Pickard, G.E., and Smith, G.A. (2017). The pUL37 tegument protein guides alpha-herpesvirus retrograde axonal transport to promote neuroinvasion. *PLoS Pathog.* *13*, e1006741.
16. York, I.A., Roop, C., Andrews, D.W., Riddell, S.R., Graham, F.L., and Johnson, D.C. (1994). A cytosolic herpes simplex virus protein inhibits antigen presentation to CD8+ T lymphocytes. *Cell* *77*, 525–535.
17. Uchida, H., Chan, J., Shrivastava, I., Reinhart, B., Grandi, P., Glorioso, J.C., and Cohen, J.B. (2013). Novel mutations in gB and gH circumvent the requirement for known gD Receptors in herpes simplex virus 1 entry and cell-to-cell spread. *J. Virol.* *87*, 1430–1442.
18. Mazzacurati, L., Marzulli, M., Reinhart, B., Miyagawa, Y., Uchida, H., Goins, W.F., Li, A., Kaur, B., Caligiuri, M., Cripe, T., et al. (2015). Use of miRNA response sequences to block off-target replication and increase the safety of an unattenuated, glioblastoma-targeted oncolytic HSV. *Mol. Ther.* *23*, 99–107.
19. Baradaran, K., Dabrowski, C.E., and Schaffer, P.A. (1994). Transcriptional analysis of the region of the herpes simplex virus type 1 genome containing the UL8, UL9, and UL10 genes and identification of a novel delayed-early gene product, OBPC. *J. Virol.* *68*, 4251–4261.
20. Lee, C.Y., Rennie, P.S., and Jia, W.W. (2009). MicroRNA regulation of oncolytic herpes simplex virus-1 for selective killing of prostate cancer cells. *Clin. Cancer Res.* *15*, 5126–5135.
21. Li, J.M., Kao, K.C., Li, L.F., Yang, T.M., Wu, C.P., Horng, Y.M., Jia, W.W., and Yang, C.T. (2013). MicroRNA-145 regulates oncolytic herpes simplex virus-1 for selective killing of human non-small cell lung cancer cells. *Virol. J.* *10*, 241.
22. Marabelle, A., Kohrt, H., Caux, C., and Levy, R. (2014). Intratumoral immunization: a new paradigm for cancer therapy. *Clin. Cancer Res.* *20*, 1747–1756.
23. Fornari, F., Gramantieri, L., Giovannini, C., Veronese, A., Ferracin, M., Sabbioni, S., Calin, G.A., Grazi, G.L., Croce, C.M., Tavoroli, S., et al. (2009). MiR-122/cyclin G1 interaction modulates p53 activity and affects doxorubicin sensitivity of human hepatocarcinoma cells. *Cancer Res.* *69*, 5761–5767.
24. Gramantieri, L., Ferracin, M., Fornari, F., Veronese, A., Sabbioni, S., Liu, C.G., Calin, G.A., Giovannini, C., Ferrazzi, E., Grazi, G.L., et al. (2007). Cyclin G1 is a target of miR-122a, a microRNA frequently down-regulated in human hepatocellular carcinoma. *Cancer Res.* *67*, 6092–6099.
25. Fish, J.E., Santoro, M.M., Morton, S.U., Yu, S., Yeh, R.F., Wythe, J.D., Ivey, K.N., Bruneau, B.G., Stainier, D.Y., and Srivastava, D. (2008). miR-126 regulates angiogenic signaling and vascular integrity. *Dev. Cell* *15*, 272–284.
26. Wang, S., Aurora, A.B., Johnson, B.A., Qi, X., McAnally, J., Hill, J.A., Richardson, J.A., Bassel-Duby, R., and Olson, E.N. (2008). The endothelial-specific microRNA miR-126 governs vascular integrity and angiogenesis. *Dev. Cell* *15*, 261–271.
27. Sempere, L.F., Freemantle, S., Pitha-Rowe, I., Moss, E., Dmitrovsky, E., and Ambros, V. (2004). Expression profiling of mammalian microRNAs uncovers a subset of brain-expressed microRNAs with possible roles in murine and human neuronal differentiation. *Genome Biol.* *5*, R13.
28. Lagos-Quintana, M., Rauhut, R., Yalcin, A., Meyer, J., Lendeckel, W., and Tuschl, T. (2002). Identification of tissue-specific microRNAs from mouse. *Curr. Biol.* *12*, 735–739.
29. Ameres, S.L., Martinez, J., and Schroeder, R. (2007). Molecular basis for target RNA recognition and cleavage by human RISC. *Cell* *130*, 101–112.
30. Wang, Z. (2011). The guideline of the design and validation of miRNA mimics. *Methods Mol. Biol.* *676*, 211–223.
31. Früh, K., Ahn, K., Djaballah, H., Sempé, P., van Ender, P.M., Tampé, R., Peterson, P.A., and Yang, Y. (1995). A viral inhibitor of peptide transporters for antigen presentation. *Nature* *375*, 415–418.
32. Todo, T., Martuza, R.L., Rabkin, S.D., and Johnson, P.A. (2001). Oncolytic herpes simplex virus vector with enhanced MHC class I presentation and tumor cell killing. *Proc. Natl. Acad. Sci. USA* *98*, 6396–6401.
33. Uchida, H., Chan, J., Goins, W.F., Grandi, P., Kumagai, I., Cohen, J.B., and Glorioso, J.C. (2010). A double mutation in glycoprotein gB compensates for ineffective gD-dependent initiation of herpes simplex virus type 1 infection. *J. Virol.* *84*, 12200–12209.
34. Fujioka, N., Akazawa, R., Ohashi, K., Fujii, M., Ikeda, M., and Kurimoto, M. (1999). Interleukin-18 protects mice against acute herpes simplex virus type 1 infection. *J. Virol.* *73*, 2401–2409.
35. Sundaresan, P., Hunter, W.D., Martuza, R.L., and Rabkin, S.D. (2000). Attenuated, replication-competent herpes simplex virus type 1 mutant G207: safety evaluation in mice. *J. Virol.* *74*, 3832–3841.
36. Bommareddy, P.K., Peters, C., Saha, D., Rabkin, S.D., and Kaufman, H.L. (2018). Oncolytic Herpes Simplex Viruses as a Paradigm for the Treatment of Cancer. *Annu. Rev. Cancer Biol.* *2*, 155–173.
37. Geisler, A., and Fechner, H. (2016). MicroRNA-regulated viral vectors for gene therapy. *World J. Exp. Med.* *6*, 37–54.
38. Zhang, S., Li, J., Li, J., Yang, Y., Kang, X., Li, Y., Wu, X., Zhu, Q., Zhou, Y., and Hu, Y. (2018). Up-regulation of microRNA-203 in influenza A virus infection inhibits viral replication by targeting DR1. *Sci. Rep.* *8*, 6797.
39. Grizzle, W.E., Gunter, E.W., Sexton, K.C., and Bell, W.C. (2015). Quality management of biorepositories. *Biopreserv. Biobank.* *13*, 183–194.
40. Mullokandov, G., Baccharini, A., Ruzo, A., Jayaprakash, A.D., Tung, N., Israelow, B., Evans, M.J., Sachidanandam, R., and Brown, B.D. (2012). High-throughput assessment of microRNA activity and function using microRNA sensor and decoy libraries. *Nat. Methods* *9*, 840–846.
41. Chee, A.V., and Roizman, B. (2004). Herpes simplex virus 1 gene products occlude the interferon signaling pathway at multiple sites. *J. Virol.* *78*, 4185–4196.

## **Supplemental Information**

### **Design of an Interferon-Resistant Oncolytic**

### **HSV-1 Incorporating Redundant Safety**

### **Modalities for Improved Tolerability**

**Edward M. Kennedy, Terry Farkaly, Peter Grzesik, Jennifer Lee, Agnieszka Denslow, Jacqueline Hewett, Jeffrey Bryant, Prajna Behara, Caitlin Goshert, Daniel Wambua, Ana De Almeida, Judith Jacques, Damian Deavall, James B. Rottman, Joseph C. Glorioso, Mitchell H. Finer, Brian B. Haines, Christophe Quéva, and Lorena Lerner**



## SUPPLEMENTAL INFORMATION

### **Design of an interferon-resistant oncolytic HSV-1 incorporating redundant safety modalities for improved tolerability**

Edward M. Kennedy,<sup>1\*</sup> Terry Farkaly,<sup>1\*</sup> Peter Grzesik,<sup>1</sup> Jennifer Lee,<sup>1</sup> Agnieszka Denslow,<sup>1</sup> Jacqueline Hewett,<sup>1</sup> Jeffrey Bryant,<sup>1</sup> Prajna Behara,<sup>1\*\*</sup> Caitlin Goshert,<sup>1\*\*</sup> Daniel Wambua,<sup>1</sup> Ana de Almeida,<sup>1</sup> Judith Jacques,<sup>1</sup> Damian Deavall,<sup>2</sup> James B. Rottman,<sup>3</sup> Joseph C. Glorioso,<sup>4</sup> Mitchell H. Finan,<sup>1\*\*</sup> Brian B. Haines,<sup>1</sup> Christophe Quéva,<sup>1</sup> Lorena Lerner<sup>1</sup>

<sup>1</sup>Oncorus, Inc., Cambridge, MA, USA; <sup>2</sup>ApconiX, Alderley Park, Mereside, Macclesfield, UK; <sup>3</sup>Athenaeum Pathology Consulting, LLC, Sudbury, MA, USA; <sup>4</sup>University of Pittsburgh, School of Medicine, Department of Microbiology and Molecular Genetics, Pittsburgh, PA, USA

## **METHODS**

### **Total RNA Isolation from Cells in Culture**

Media was aspirated, and cells from each well were collected in Trizol. 200 $\mu$ L chloroform was added to 1mL Qiazol Lysis Reagent and vortexed vigorously for 15 sec. After 2-min incubation at room temperature, samples were centrifuged at 12,000 x g for 15 minutes at 4°C. 0.5 mL isopropanol and 1  $\mu$ L of glycoblue was added and vortexed briefly. Samples were incubated at room temperature for 10 min and centrifuged at 12,000 x g for 10 mins at 4°C. 1mL 75% ice-cold ethanol per and 1:10 3M sodium acetate were added to each sample, mixed gently and incubated on ice 2 min, then centrifuged at 7500 x g for 5 min at 4°C. 1mL 75% ice-cold ethanol per was added, samples were incubated on ice for 2 min, and centrifuged at 7500 x g for 5 min at 4°C. RNA pellet was dried and resuspended in 40  $\mu$ L RNase-free water.

### **nanoString TagSet Gene Expression**

Gene expression using nanoString (NanoString Technologies Inc. Seattle, WA) was performed per the manufacturer protocol (PlexSet Reagents for Gene Expression User Manual). The raw data (.RCC files) quality control was conducted. Raw data was checked through the nSolver 4.0 software to ensure 1) binding density was appropriate, 2) ligation controls were in the appropriate range, and 3) positive hybridization controls were correct.

Datasets were normalized in nSolver™ 4.0 by background thresholding the geometric mean across the negative controls, any samples outside of the 0.3 to 3 normalization factor range were omitted. Subsequently, normalization of the geometric mean of the positive controls was conducted to account for hybridization efficiency. CodeSet content is normalized to the geometric mean across 3 housekeeping genes (ABCF1, GUSB, HPRT1). Any samples for which the normalization factors were outside of the 0.1 to 10 range were omitted.

A heat map summary of the miRNA ratios was generated using Broad Institute's Morpheus software <https://software.broadinstitute.org/morpheus/>.

### **Gene Expression by RT-qPCR**

Isolated total RNA from cell cultures samples were normalized to 500 ng of input for reverse transcription using oligo(dT) primers and cDNA synthesis using SuperScript IV (ThermoFisher, 18090010) according to the manufacturer's protocol. Each cDNA sample (5  $\mu$ L) was added to MicroAmp Optical 96-well reaction plates (Invitrogen, ThermoFisher Applied Biosystems™, N8010560) containing 15  $\mu$ L of Taqman Fast Advanced Master Mix (Invitrogen, ThermoFisher Applied Biosystems, 4444554). RT-qPCR was performed on Applied Biosystems QuantStudio 5 thermocycler with 1 cycle of 95°C for 20 sec, followed by 40 cycles of 95°C for 1 sec denaturation and 60°C for 20 sec (annealing/extension). Specific NFQ-MGB TaqMan Advanced assay probes (ThermoFisher PN4331348) were used for each gene present in the assay.  $2^{-\Delta\Delta C_t}$  calculations were performed and results were reported as ratios by normalizing the target gene to a housekeeping mRNA (GAPDH, ThermoFisher PN4448489), and each target gene to each probe for both negative siRNA and target siRNA.

### **miRNA RT-qPCR**

Isolated RNA tissue samples were normalized to 10 ng of input for reverse transcription and cDNA synthesis using Taqman Advanced miRNA cDNA Synthesis Kit (Invitrogen, ThermoFisher Applied Biosystems™, A28007) according to the manufacturer's protocol. Each cDNA sample (5  $\mu$ L) was added to MicroAmp Optical 96-well reaction plates (Invitrogen, ThermoFisher Applied Biosystems™, N8010560) containing 15  $\mu$ L of Taqman Fast Advanced Master Mix (Invitrogen, ThermoFisher Applied Biosystems, 4444554). RT-qPCR was performed on Applied Biosystems QuantStudio 5 thermocycler with 1 cycle of 95°C for 20 sec, followed by 40 cycles of 95°C for 1 sec denaturation and 60°C for 20 sec (annealing/extension). Specific NFQ-MGB TaqMan Advanced miRNA assay probes (Invitrogen, ThermoFisher Applied Biosystems, A25576) were used for each miRNA present in the assay. A miRNA standard curve was established using a universal standard curve with a non-mammalian exogenous 5' phosphorylated standard, Arabidopsis thaliana miRNA ath-159a (Invitrogen, ThermoFisher, 478411\_mir). miRNA copy numbers were calculated using the synthetic miR ath-159a, utilizing the similarity of short miRNA sequences to amplify at the same rate (within 0.5 cycle threshold) with no cross-specificity between synthetic and human miRNA. A dynamic range of 10,000,000 to 100 copies was established and verified with synthesized human miRNA standards to validate ath-159a as a universal miRNA standard curve. Final copy number per 10 ng RNA was quantified and normalized to determine fold change expression over the negative mimic control.

## Mouse Tissue RNA Extraction

Whole brain mouse tissues were sourced from Brain Bits LLC (Springfield, IL). Samples were flash frozen immediately after resection from C57BL/6 mice. Additional tissue samples were obtained from Charles River Laboratories (Wilmington, MA). Twenty mg sections were cut by scalpel and placed in a 1.5 mL Eppendorf tube and stored at -80°C.

For RNA isolation, tissue samples were thawed on ice. Qiazol (Qiagen) and chloroform were chilled on ice prior to use. Qiazol (700 µL) was added to each tube containing a tissue section, and disposable RNase-free pestles were used to homogenize the tissue. Subsequently, 140 µL of chloroform was added and centrifuged at maximum speed for 10 min. The upper aqueous phase (300 µL) was transferred to a new tube and 450 µL of 100% ethanol at room temperature was then added and mixed. Approximately 700 µL of this mixture was transferred to a Qiagen miRneasy column. The remaining steps in this process was performed according to the manufacturer's protocol (Qiagen miRneasy Kit, 217004). Each RNA sample in this report was analyzed by a NanoDrop spectrophotometer (ThermoFisher Scientific, Wilmington, MA) to confirm sample quality as recommended by nCounter<sup>®</sup> miRNA Expression Assay User Manual.

## nanoString Mouse miRNA Profiling

miRNA profiling using nanoString (NanoString Technologies Inc. Seattle, WA) was performed exactly as per the manufacturer protocol (nCounter<sup>®</sup> miRNA Expression Assay User Manual).

All individual tissue samples were analyzed with the mouse miRv1.5 panel on the nanoString Sprint instrument. Sample preparation was performed exactly per the manufacturer recommendations, and the raw data (.RCC files) quality control was conducted. Raw data was checked through the nSolver 4.0 software to ensure 1) binding density was appropriate, 2) ligation controls were in the appropriate range, and 3) positive hybridization controls were correct. These analyses were performed with nSolver<sup>™</sup> 4.0 and exported raw data.

Datasets were normalized in nSolver<sup>™</sup> by background thresholding the geometric mean across the negative controls, any samples outside of the 0.3 to 3 normalization factor range were omitted. Subsequently, normalization to the geometric mean of the positive controls was conducted to account for hybridization efficiency and was scaled to all endogenous and housekeeping genes to 1,000,000 total count of the lane. Any samples for which the normalization factors were outside of the 0.1 to 10 range were omitted.

A heat map summary of the miRNA ratios was generated using Broad Institute's <https://software.broadinstitute.org/morpheus/> Morpheus software.

## In silico generation of miR-T cassettes

A computer script written in the Python programming language was written to generate miR-T cassettes that are optimal for RISC targeting. This script inserts the correct target sequence in the cassette such that no two targets are repeated in-line, to prevent potential steric occlusion of RISC occupied adjacent targets. It also searches for tumor specific miRNA targets or seed targets that may be present by chance as random spacers are generated. If these sequences are encountered, these candidates are eliminated. Then an automated effort to eliminate structured elements is performed, as RNA secondary structure is also a known inhibitor of RISC targeting.<sup>1</sup> The optimal lowest predicted structured cassette is then selected. These cassettes were then validated individually with a well validated tool to objectively detect miRNA binding sites called miRANDA.<sup>2</sup>

## Biodistribution Studies

BALB/c mice bearing established (~100 mm<sup>3</sup>) dual flank A20 tumors were administered 3x10<sup>5</sup>-3x10<sup>6</sup> PFU, depending upon the study of ONCR-159 into the right flank tumor. Tissues (injected and contralateral tumors, liver, and blood) were harvested 4, 24, 48, 72, and 168 hours post dose. Genomic viral DNA from tumors and liver was quantified using the nanodrop and diluted to 25 ng/µl in nuclease free water. Blood samples were diluted to 10 ng/µl. Five µl/well of either the DNA sample (corresponding to 125 ng of DNA from tumors or 50 ng of DNA from blood) or the US6 plasmid standard was used in a qPCR reaction, performed in technical triplicates, to detect HSV-1 genomes on a Quantstudio5 qPCR instrument with the following thermal cycler conditions: Hold Stage: 95°C for 1 second, PCR stage: 95°C for 1 second, followed by 60°C for 30 seconds. The PCR stage was performed for 45 cycles. Plasmid standards were used to generate a standard curve with known amount of copies corresponding to a set of Ct values. Based on this standard curve, the amount of HSV genome copies in the sample were calculated.

The copy number calculations were done on the Quantstudio software. Since 125 ng/well of tumor DNA or 50 ng/well of blood DNA was loaded in the qPCR assay, a conversion factor was applied to the copy number in order to plot them as copies/ $\mu$ g of DNA. Technical duplicates were averaged and the results of individual animals within each group were plotted using GraphPad software. Conversion of copy number to copies/ $\mu$ g and calculations of averages were done on Microsoft Excel. PCR Primer/probe: Fwd: 5'-CCCCTGGAAGTACTATGACA-3'; Rev: 5'-GCATCAGGAACCCAGGTT-3'; Probe: 5'-TTCAGCGCCGTCAGCGAGGA-3' with FAM as the reporter dye and MGB-NFQ as the quencher.

### **Total RNA Isolation from Cells in Culture**

Media was aspirated, and cells from each well were collected in Trizol. 200  $\mu$ L chloroform was added to 1 mL Qiazol Lysis Reagent and vortexed vigorously for 15 seconds. After 2-minute incubation at room temp, samples were centrifuged at 12,000 x g for 15 minutes at 4°C. 0.5 mL isopropanol and 1  $\mu$ L of glycoblue was added and vortexed briefly. Samples were incubated at room temperature for 10 minutes and centrifuged at 12,000 x g for 10 minutes at 4°C. 1 mL 75% ice-cold ethanol per and 1:10 3M sodium acetate were added to each sample, mixed gently and incubated on ice 2 minutes, then centrifuged at 7500 x g for 5 minutes at 4°C. 1 mL 75% ice-cold ethanol per was added, incubated on ice for 2 minutes, and centrifuged at 7500 x g for 5 minutes at 4°C. RNA pellet was dried and resuspended in 40  $\mu$ L RNase-free water.

### **nanoString TagSet Gene Expression**

Gene expression using nanoString (NanoString Technologies Inc. Seattle, WA) was performed exactly as per the manufacturer protocol (PlexSet Reagents for Gene Expression User Manual). Each total RNA from cell culture samples were analyzed in a separate multiplexed reaction. nCounter TagSet technology consists of specific reporter tags comprised of unique fluorescent barcodes linked to specific nucleotide Tags. A biotinylated universal capture tag hybridizes to a pair of target-specific oligonucleotide probes that hybridize directly to single-stranded RNA targets. The universal capture tag anchors each target to the surface of a streptavidin-coated lane, followed by 2 custom oligonucleotide probes specific to target nucleic acid sequences. Once these probes are bound to their target nucleic acid sequences, unique fluorescent barcodes hybridize to the 5' region of the probe and the universal capture probe to the 3' region of the target nucleic acid probes to form a Tag Complex. Reporter tags each have a unique 6 color pattern of fluorescent barcodes that can be individually resolved and counted. Sample preparation was performed exactly per the manufacturer recommendations, and the raw data (.RCC files) quality control was conducted. Raw data was checked through the nSolver 4.0 software to ensure 1) binding density was appropriate, 2) ligation controls were in the appropriate range, and 3) positive hybridization controls were correct. These analyses were performed with nSolver™ 4.0 and exported raw data.

Datasets were normalized in nSolver™ by background thresholding the geometric mean across the negative controls, any samples outside of the 0.3 to 3 normalization factor range were omitted. Subsequently, normalization of the geometric mean of the positive controls was conducted to account for hybridization efficiency. CodeSet content is normalized to the geometric mean across 3 housekeeping genes (ABCF1, GUSB, HPRT1). Any samples for which the normalization factors were outside of the 0.1 to 10 range were omitted.

A heat map summary of the miRNA ratios was generated using Broad Institute's <https://software.broadinstitute.org/morpheus/> Morpheus software.

### **Gene Expression RT-qPCR**

Isolated total RNA from cell cultures samples were normalized to 500 ng of input for reverse transcription using oligo(dT) primers and cDNA synthesis using SuperScript IV (ThermoFisher, 18090010) according to the manufacturer's protocol. Each cDNA sample (5  $\mu$ L) was added to MicroAmp Optical 96-well reaction plates (Invitrogen, ThermoFisher Applied Biosystems™, N8010560) containing 15  $\mu$ L of Taqman Fast Advanced Master Mix (Invitrogen, ThermoFisher Applied Biosystems, 4444554). RT-qPCR was performed on Applied Biosystems QuantStudio 5 thermocycler with 1 cycle of 95°C for 20 sec, followed by 40 cycles of 95°C for 1 sec denaturation and 60°C for 20 sec (annealing/extension). Specific NFQ-MGB TaqMan Advanced assay probes (ThermoFisher PN4331348) were used for each gene present in the assay.  $2^{\Delta\Delta C_t}$  calculations were performed and results were reported as ratios by normalizing the target gene to a housekeeping mRNA (GAPDH, ThermoFisher PN4448489), and each target gene to each probe for both negative siRNA and target siRNA.



## **miRNA RT-qPCR**

Isolated RNA tissue samples were normalized to 10 ng of input for reverse transcription and cDNA synthesis using Taqman Advanced miRNA cDNA Synthesis Kit (Invitrogen, ThermoFisher Applied Biosystems™, A28007) according to the manufacturer's protocol. Each cDNA sample (5 µL) was added to MicroAmp Optical 96-well reaction plates (Invitrogen, ThermoFisher Applied Biosystems™, N8010560) containing 15 µL of Taqman Fast Advanced Master Mix (Invitrogen, ThermoFisher Applied Biosystems, 4444554). RT-qPCR was performed on Applied Biosystems QuantStudio 5 thermocycler with 1 cycle of 95°C for 20 sec, followed by 40 cycles of 95°C for 1 sec denaturation and 60°C for 20 sec (annealing/extension). Specific NFQ-MGB TaqMan Advanced miRNA assay probes (Invitrogen, ThermoFisher Applied Biosystems, A25576) were used for each miRNA present in the assay. A miRNA standard curve was established using a universal standard curve with a non-mammalian exogenous 5' phosphorylated standard, Arabidopsis thaliana miRNA ath-159a (Invitrogen, ThermoFisher, 478411\_mir). miRNA copy numbers were calculated using the synthetic miR ath-159a, utilizing the similarity of short miRNA sequences to amplify at the same rate (within 0.5 cycle threshold) with no cross-specificity between synthetic and human miRNA. A dynamic range of 10,000,000 to 100 copies was established and verified with synthesized human miRNA standards to validate ath-159a as a universal miRNA standard curve. Final copy number per 10 ng RNA was quantified and normalized to determine fold change expression over the negative mimic control.

## **Mouse Tissue RNA Extraction**

Whole brain mouse tissues were sourced from Brain Bits LLC (Springfield, IL). Samples were flash frozen immediately after resection from C57BL/6 mice. Additional tissue samples were obtained from Charles River Laboratories (Wilmington, MA). Twenty milligram sections were cut by scalpel and placed in a 1.5 mL Eppendorf tube and stored at -80°C.

For RNA isolation, each tissue sample was thawed on ice. Qiazol (Qiagen) and chloroform were chilled on ice prior to use. Qiazol (700 µL) was added to each tube containing a tissue section, and disposable RNase-free pestles were used to homogenize the tissue. Subsequently, 140 µL of chloroform was added and centrifuged at maximum speed for 10 min. The upper aqueous phase (300 µL) was transferred to a new tube and 450 µL of 100% ethanol at room temperature was then added and mixed. Approximately 700 µL of this mixture was transferred to a Qiagen miRneasy column. The remaining steps in this process was performed according to the manufacturer's protocol (Qiagen miRneasy Kit, 217004). Each RNA sample in this report was analyzed by a NanoDrop spectrophotometer (ThermoFisher Scientific, Wilmington, MA) to confirm sample quality as recommended by nCounter® miRNA Expression Assay User Manual.

## **nanoString Mouse miRNA Profiling**

miRNA profiling using nanoString (NanoString Technologies Inc. Seattle, WA) was performed exactly as per the manufacturer protocol (nCounter® miRNA Expression Assay User Manual). Each total RNA sample was analyzed in a separate multiplexed reaction. Briefly, unique oligonucleotide tags are ligated onto miRNAs, allowing short RNAs to be detected without amplification. Multiplexed hybridization of specific tags to their target miRNA, a biotin capture probe, and a unique reporter probe form a Target-Probe complex were hybridized in solution. After hybridization, the hybridization mixture containing the target/probe complexes is allowed to bind to magnetic beads complementary to sequences on the capture probe. Wash steps ensure excess probes without a complementary target were removed using a two-step magnetic bead-based purification. Final purified target/probe complexes are eluted off the beads, immobilized, and aligned to the cartridge. Barcodes were read on a digital analyzer in a high-throughput automated fashion for up to 600 individual miRNAs per sample. Quantification was performed on a nanoString SPRINT instrument with the nanoString Mouse miRNA Panel 1.5.

All individual tissue samples were analyzed with the mouse miRv1.5 panel on the nanoString Sprint instrument. Sample preparation was performed exactly per the manufacturer recommendations, and the raw data (.RCC files) quality control was conducted. Raw data was checked through the nSolver 4.0 software to ensure 1) binding density was appropriate, 2) ligation controls were in the appropriate range, and 3) positive hybridization controls were correct. These analyses were performed with nSolver™ 4.0 and exported raw data.

Datasets were normalized in nSolver™ by background thresholding the geometric mean across the negative controls, any samples outside of the 0.3 to 3 normalization factor range were omitted. Subsequently, normalization to the geometric mean of the positive controls was conducted to account for hybridization efficiency and was scaled to all endogenous and housekeeping genes to 1,000,000 total count of the lane. Any samples for which the

normalization factors were outside of the 0.1 to 10 range were omitted. A heat map summary of the miRNA ratios was generated using Broad Institute's <https://software.broadinstitute.org/morpheus/> Morpheus software.

### **In silico generation of miR-T cassettes**

A computer script written in the Python programming language was written to generate miR-T cassettes that are optimal for RISC targeting. This script inserts the correct target sequence in the cassette such that no two targets are repeated in-line, to prevent potential steric occlusion of RISC occupied adjacent targets. It also searches for tumor specific miRNA targets or seed targets that may be present by chance as random spacers are generated. If these sequences are encountered, these candidates are eliminated. Then an automated effort to eliminate structured elements is performed, as RNA secondary structure is also a known inhibitor of RISC targeting (Ameres et al. 2007). The optimal lowest predicted structured cassette is then selected. These cassettes were then validated individually with a well validated tool to detect miRNA binding sites objectively called miRANDA.

### **Biodistribution Studies**

BALB/c mice bearing established (~100 mm<sup>3</sup>) dual flank A20 tumors were administered  $3 \times 10^5$ - $3 \times 10^6$  PFU, depending upon the study of ONCR-159 into the right flank tumor. Tissues (injected and contralateral tumors, liver, and blood) were harvested 4, 24, 48, 72, and 168 hours post dose. Genomic viral DNA from tumors and liver was quantified using the nanodrop and diluted to 25 ng/ $\mu$ l in nuclease free water. Blood samples were diluted to 10 ng/ $\mu$ l. Five  $\mu$ l/well of either the DNA sample (corresponding to 125 ng of DNA from tumors or 50 ng of DNA from blood) or the US6 plasmid standard was used in a qPCR reaction, performed in technical triplicates, to detect HSV-1 genomes on a Quantstudio5 qPCR instrument with the following thermal cycler conditions: Hold Stage: 95°C for 1 second, PCR stage: 95°C for 1 second, followed by 60°C for 30 seconds. The PCR stage was performed for 45 cycles. The plasmid standards used in the assay were used to generate a standard curve with known amount of copies corresponding to a set of Ct values. Based on this standard curve, the amount of HSV genome copies in the sample were calculated. The copy number calculations were done on the Quantstudio software. Since 125 ng/well of tumor DNA or 50 ng/well of blood DNA was loaded in the qPCR assay, a conversion factor was applied to the copy number in order to plot them as copies/ $\mu$ g of DNA. Technical duplicates were averaged and the results of individual animals within each group were plotted using GraphPad software. Conversion of copy number to copies/ $\mu$ g and calculations of averages were done on Microsoft Excel. PCR Primer/probe: Fwd: 5'-CCCGCTGGA ACTACTATGACA-3'; Rev: 5'-GCATCAGGAACCCCAGGTT-3'; Probe: 5'-TTCAGCGCCGTCAGCGAGGA-3' with FAM as the reporter dye and MGB-NFQ as the quencher.

TABLES

**Table S1. siRNA sequences utilized in the siRNA screen**

| <b>Target Gene</b> | <b>siRNA sequence</b> |
|--------------------|-----------------------|
| ICP0 siRNA 1       | GGGAGGGAGACAAGAGGAA   |
| ICP0 siRNA 2       | CCACCACGGACGAGGAUGA   |
| ICP0 siRNA 3       | GGACGAGGGAAAACAAUAA   |
| RS1-ICP4 siRNA 1   | ACGAGGACGACGACGGCAA   |
| RS1-ICP4 siRNA 2   | CCGCGGACCUGCUGUUUGA   |
| RS1-ICP4 siRNA 3   | CGGACUUCUGCGAGGAGGA   |
| UL5 siRNA 1        | CCAGCUAGACGGACAGAAA   |
| UL5 siRNA 2        | UCAUGAAGGUGCUGGAGUA   |
| UL5 siRNA 3        | GCUCAUAUUUAGCGGGCUU   |
| UL8 siRNA 1        | GCACGGGACUGGUGGUGAA   |
| UL8 siRNA 2        | GCUCAUCACCUGCGCGAAA   |
| UL8 siRNA 3        | CGACGGAGCUGCGGGAUUU   |
| UL9 siRNA 1        | CAACAAAUCCGUUACAAA    |
| UL9 siRNA 2        | CAGUACACGUCGAGCGUAU   |
| UL9 siRNA 3        | CCAAUUACAUAUGAACGA    |
| UL29-ICP8 siRNA 1  | ACUGCGACGUGCUGGGAAA   |
| UL29-ICP8 siRNA 2  | CCGACAAGCGCGUGGACAU   |
| UL29-ICP8 siRNA 3  | GCGAGGACAUCGAGACCAU   |
| UL30 siRNA 1       | CCAUCAAGGUCGUGUGUAA   |
| UL30 siRNA 2       | AGAAGAAGGACCUGAGCUA   |
| UL30 siRNA 3       | AGAUAAAGGUGAACGGCAU   |
| UL39-40 siRNA 1    | GGGAAAUGUUCAAGUUCUU   |
| UL39-UL40 siRNA 2  | GCAUAUAAGCGCGGACUAA   |
| UL39-UL40 siRNA 3  | GGGAGGAGUUCGAGAAGCU   |
| UL42 siRNA 1       | GGACACGGCCCUAAAGAAA   |
| UL42 siRNA 2       | GCGCCGAACUUAUGGAAU    |
| UL42 siRNA 3       | CCGUUGAGCUAGCCAGCGA   |
| UL48-VP16 siRNA 1  | CAACAUGUCCAGAUCGAAAUU |
| UL48-VP16 siRNA 2  | GGUACAGGGCCGAGCAGAAUU |
| UL48-VP16 siRNA 3  | GCAAACAGCUCGUCGACCAUU |
| UL54-ICP27 siRNA 1 | CGGACGAGGACAUGGAAGA   |
| UL54-ICP27 siRNA 2 | GCGCACAGGUCAUGCACGA   |
| UL54-ICP27 siRNA 3 | UGGCGGACAUAAGGACAU    |
| US1-ICP22 siRNA 1  | GGAGUGUGAUCUUAGUAAU   |
| US1-ICP22 siRNA 2  | CGACAAGCGAUGAUGAAU    |
| US1-ICP22 siRNA 3  | ACUGUUACCUGAUGGGUAU   |

siRNA, small interfering RNA.

**Table S2. Total number of normal and malignant human tissues assessed**

| <b>Tissue</b> | <b>Normal</b> | <b>Malignant</b> |
|---------------|---------------|------------------|
| Skin          | 4             | 14               |
| Head & Neck   | 10            | 10               |
| Lung          | 20            | 18               |
| Breast        | 0             | 10               |
| Liver         | 8             | 4                |
| Pancreas      | 11            | 10               |
| Colon         | 5             | 12               |
| Bladder       | 18            | 7                |
| Ovary         | 0             | 19               |
| Brain         | 10            | 0                |
| Heart         | 6             | 0                |
| Spinal Cord   | 4             | 0                |
| Nerve         | 4             | 0                |
| Artery        | 3             | 0                |
| Vein          | 6             | 0                |
| Ganglion      | 1             | 0                |
| <b>Total</b>  | <b>110</b>    | <b>104</b>       |



**Table S3. Summary of the normal tissue specimens used in this study**

| <b>Normal Tissue (Total)</b> | <b>Subtype(s) (Total)</b>                                         |
|------------------------------|-------------------------------------------------------------------|
| Skin (4)                     | Skin structure (3), Skin and subcutaneous tissue (1)              |
| Head & Neck (10)             | Oral Cavity: Tongue (5), Larynx (1), Esophagus (1) Oropharynx (3) |
| Lung (20)                    | Lung normal adjacent uninvolved (20)                              |
| Liver (8)                    | Liver normal adjacent uninvolved (8)                              |
| Pancreas (11)                | Pancreatic body, normal adjacent uninvolved (11)                  |
| Colon (5)                    | Colon normal adjacent uninvolved (5)                              |
| Bladder (18)                 | Bladder normal adjacent uninvolved (18)                           |
| Brain (10)                   | Temporal lobe (3), Parietal lobe (1), Normal brain (6)            |
| Heart (6)                    | Heart normal adjacent uninvolved (6)                              |
| Spinal Cord (4)              | Spine normal adjacent uninvolved (4)                              |
| Nerve (4)                    | Nerve normal adjacent uninvolved (4)                              |
| Artery (3)                   | Artery normal adjacent uninvolved (3)                             |
| Vein (6)                     | Vein normal adjacent uninvolved (6)                               |

**Table S4. Summary of the malignant tissue specimens used in this study**

| <b>Malignant Tissue (Total)</b> | <b>Subtype(s) (Total)</b>                                                                                                                                         |
|---------------------------------|-------------------------------------------------------------------------------------------------------------------------------------------------------------------|
| Skin (14)                       | Primary melanoma (4), Melanoma metastases (9), Uveal melanoma (1)                                                                                                 |
| Head & Neck (10)                | Nasopharynx (1), Tongue (1), Squamous cell carcinoma: Larynx (1), Oropharynx (1), Tongue (5), Soft palate (1)                                                     |
| Lung (18)                       | Carcinoma: Bronchioalveolar (1), Non-small cell (2), Adenocarcinoma (5), Squamous cell (6), Adenoid cystic (1), Mucosa-associated lymphoma (1), Adenosquamous (2) |
| Breast (10)                     | Carcinoma: Infiltrating ductal (5), Triple negative (5)                                                                                                           |
| Liver (4)                       | Carcinoma: Hepatocellular (1), Neuroendocrine (1), Adenocarcinoma (1), Invasive ductal (1)                                                                        |
| Pancreas (10)                   | Ductal Adenocarcinoma (7), Neuroendocrine (1), Endocrine (1), Metastatic liver carcinoma (1)                                                                      |
| Colon (12)                      | Adenocarcinoma (12)                                                                                                                                               |
| Bladder (7)                     | Urothelial carcinoma (6) Squamous cell (1)                                                                                                                        |
| Ovary (19)                      | Carcinoma (17), Sarcoma (2)                                                                                                                                       |

**Table S5. Mouse homology and seed conservation with human mature miRNA**

| <b>miRNA</b>  | <b>Species</b> | <b>Mature miRNA sequence</b> | <b>Homology</b> |
|---------------|----------------|------------------------------|-----------------|
| miR-124-3p    | Human          | uaaggcacgcgugaaugccaa        | 100%            |
|               | Mouse          | uaaggcacgcgugaaugcc          | 100%            |
| miR-1-3p      | Human          | uggaauguaaagaaguau           | 100%            |
|               | Mouse          | uggaauguaaagaaguau           | 100%            |
| miR-143-3p    | Human          | ugagaugaagcacuguagcuc        | 100%            |
|               | Mouse          | ugagaugaagcacuguagcuc        | 100%            |
| miR-128-3p    | Human          | ucacagugaaccggucucuuu        | 100%            |
|               | Mouse          | ucacagugaaccggucucuuu        | 100%            |
| miR-137-3p    | Human          | uuauugcuuaagaauacgcuag       | 100%            |
|               | Mouse          | uuauugcuuaagaauacgcuag       | 100%            |
| miR-122-5p    | Human          | uggagugugacaauagguguuug      | 100%            |
|               | Mouse          | uggagugugacaauagguguuug      | 100%            |
| miR-219a-1-5p | Human          | ugauuguccaaacgcaauucu        | 100%            |
|               | Mouse          | ugauuguccaaacgcaauucu        | 100%            |
| miR-126-3p    | Human          | ucguaccgugaguauaaugcg        | 100%            |
|               | Mouse          | ucguaccgugaguauaaugcg        | 100%            |
| miR-204-5p    | Human          | uuccuuugucauccaugccu         | 100%            |
|               | Mouse          | uuccuuugucauccaugccu         | 100%            |
| miR-217-5p    | Human          | uacugcaucaggaacugauugga      | 100%            |
|               | Mouse          | uacugcaucaggaacugacugga      | 100%            |

**Table S6. miRNA mimics used in this study**

| <b>miRNA</b>    | <b>miRNA ID</b>        | <b>Mature miRNA Sequence<sup>1</sup></b> | <b>miRBase Accession #</b> | <b>miRvana miRNA mimic Assay ID<sup>2</sup></b> | <b>ThermoFisher Lot #</b> |
|-----------------|------------------------|------------------------------------------|----------------------------|-------------------------------------------------|---------------------------|
| Neg             | <b>Neg<sup>3</sup></b> | SCRAMBLED                                | NA                         |                                                 |                           |
| hsa-mir-124-3p  | <b>124</b>             | UAAGGCACGCGGUGAAUGCCAA                   | MIMAT0000422               | MC10060                                         | ASO2B3UW                  |
| hsa-mir-1-3p    | <b>1</b>               | UGGAAUGUAAAGAAGUAUGUAU                   | MIMAT0000416               | MC10617                                         | ASO28P3N                  |
| hsa-mir-143-3p  | <b>143</b>             | UGAGAUGAAGCACUGUAGCUC                    | MIMAT0000435               | MC10883                                         | ASO28P30                  |
| hsa-mir-128-3p  | <b>128</b>             | UCACAGUGAACCGGUCUCUUU                    | MIMAT0000424               | MC11746                                         | ASO28P3M                  |
| hsa-mir-219a-5p | <b>219a</b>            | UGAUUGUCCAAACGCAAUUCU                    | MIMAT0000276               | MC10664                                         | ASO28W92                  |
| hsa-mir-122-5p  | <b>122</b>             | UGGAGUGUGACAAUGGUGUUUG                   | MIMAT0000421               | MC11012                                         | ASO28ASS                  |
| hsa-mir-137-3p  | <b>137</b>             | UUAUUGCUUAAGAAUACGCGUAG                  | MIMAT0000429               | MC10513                                         | ASO29BRX                  |
| hsa-mir-217-5p  | <b>217</b>             | UACUGCAUCAGGAACUGAUUGGA                  | MIMAT0000274               | MC12774                                         | ASO2AYTD                  |
| hsa-mir-126-3p  | <b>126</b>             | UCGUACCGUGAGUAAUAAUGCG                   | MIMAT0000445               | MC12841                                         | ASO28W50                  |

miRNA, microRNA; NA, not applicable; Neg, negative.

<sup>1</sup>Mature miRNA resulting from Drosha and Dicer processing, the sequence as defined by miRbase is shown here.

<sup>2</sup>miRvana miRNA mimics are mature miRNA (20-22 nucleotides long), chemically modified, double stranded RNA molecules designed to bind and mimic endogenous miRNA molecules.

<sup>3</sup>The negative control for cognate miRNA mimic assays (Neg mimic) is a scrambled, non-targeting sequence.

**Table S7: miRNA in-situ hybridization citations for miRNAs included in ONCR-159**

| <b>miRNA</b>    | <b>Cellular/Tissue expression</b> | <b>Reported Function</b>                                                                                                                                          | <b>Reference</b> |
|-----------------|-----------------------------------|-------------------------------------------------------------------------------------------------------------------------------------------------------------------|------------------|
| hsa-miR-1-3p    | Skeletal / Cardiac Muscle         | Promotes myoblast differentiation, known and to suppress tumor growth.                                                                                            | 3, 4             |
| hsa-miR-122-5p  | Liver                             | Most abundant liver miRNA, tumor suppressor.                                                                                                                      | 5, 6             |
| hsa-miR-124-3p  | CNS / Neurons                     | Neuron specific. Inhibits cellular proliferation.                                                                                                                 | 7, 8             |
| hsa-miR-126-3p  | Endothelium                       | Required for endothelial development and healing. Downregulated in tumors.                                                                                        | 9-11             |
| hsa-miR-128-3p  | CNS / Neurons                     | Important for neural development. Reported use for neuron miR-T development.                                                                                      | 12, 13           |
| hsa-miR-137-3p  | CNS / Neurons                     | Enriched in neurons, important for neural development.                                                                                                            | 14               |
| hsa-miR-143-3p  | Smooth Muscle                     | Enriched in muscle, tumor suppressor.                                                                                                                             | 15, 16           |
| hsa-miR-204-5p  | Brain                             | Loss associated with glioma progression.                                                                                                                          | 17               |
| hsa-miR-217-5p  | Pancreas, other                   | Downregulates MALAT1, the miRNA-216 (contains miR-217) cluster is considered a tumor suppressor cluster.                                                          | 18-20            |
| hsa-miR-219a-5p | Brain, oligodendrocytes           | Important for oligodendrocyte differentiation and myelination. Depleted in hepatocellular carcinoma tissue and glioblastoma, potential tumor suppressive effects. | 21-23            |

FIGURES

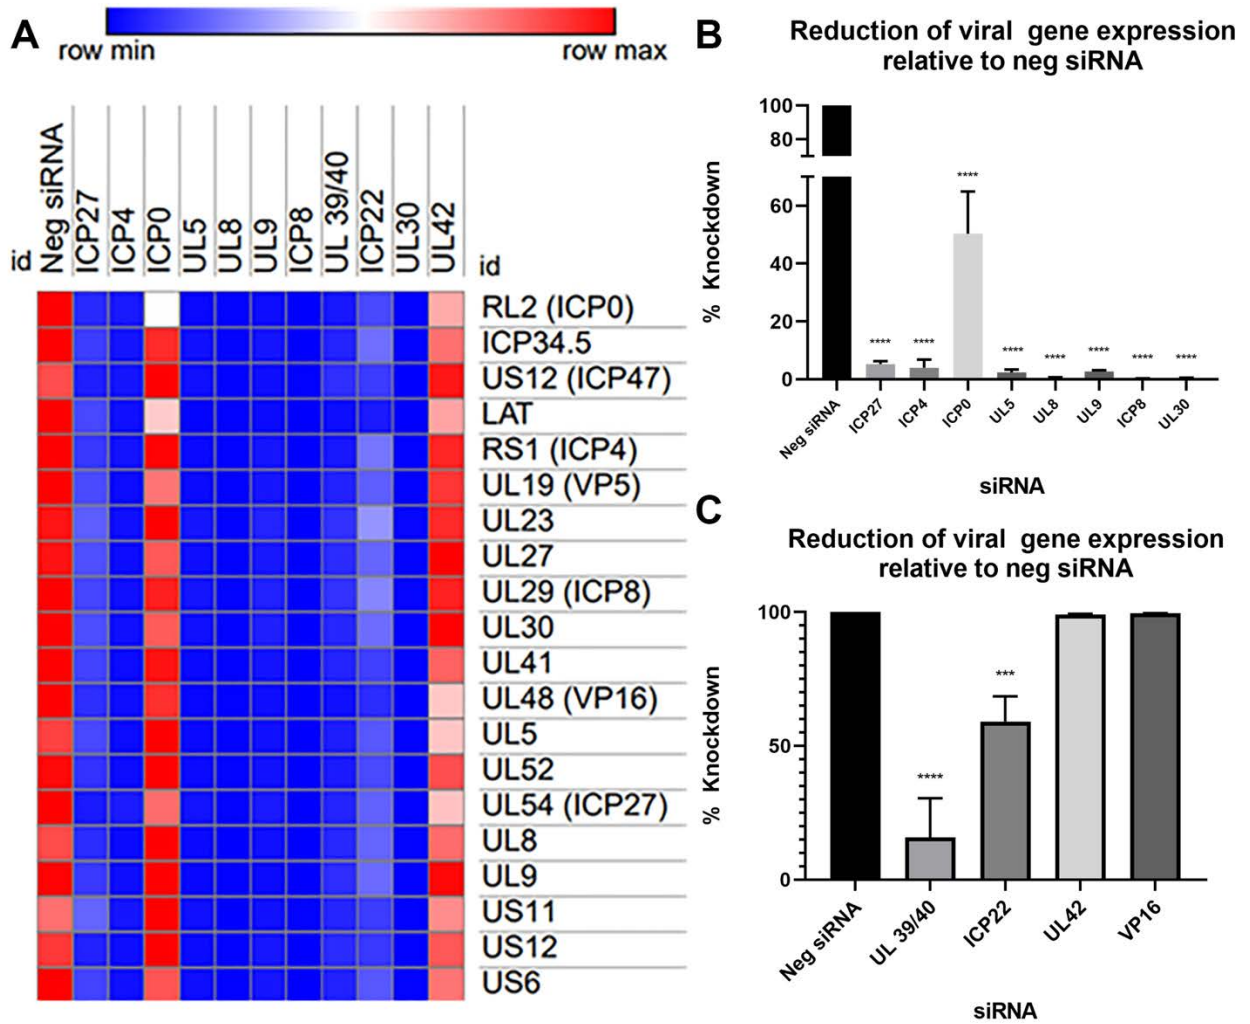

**Figure S1. Efficiency of siRNA pool mediated HSV-1 transcript repression.** Both nanoString TagSet and RT-qPCR were utilized to assess transcriptional knockdown achieved by pooled siRNA for each target HSV-1 gene. **(A)** Heatmap expression levels comparing target siRNA to negative siRNA using a custom nanoString TagSet consisting of 20 HSV-1 genes. **(B)** nanoString TagSet comparison of gene expression as a percentage (%) of negative siRNA. **(C)** 4 target genes not included in the nanoString TagSet were evaluated by  $\Delta\Delta$  RT-qPCR and plotted as a percentage (%) of negative siRNA. One-way ANOVA Dunnett's multiple comparisons test was used for statistical analysis. \*\*\* $p < 0.005$ ; \*\*\*\* $p < 0.0001$ .



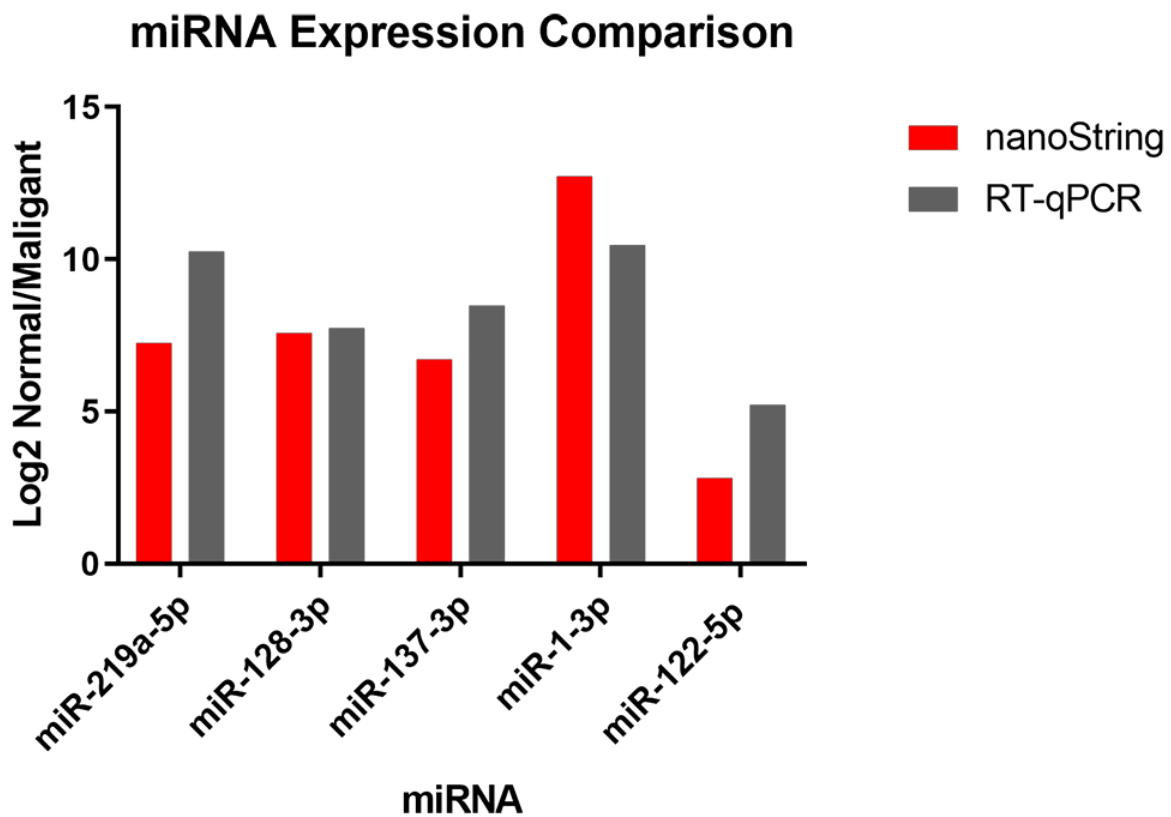

**Figure S2. Comparison of miRNA Fold Change Expression by nanoString vs. miRNA RT-qPCR.** miRNA RT-qPCR was performed in technical triplicate to quantify miRNA expressed in endogenous tissue from 5 normal human brain, 5 heart, 4 liver, 5 malignant lung, and 4 malignant liver tissue isolates. For each bar shown in the figure, normal tissue fold change/malignant between miRNA copy number and nanoString miRNA counts are compared. Values are plotted in Log2 to compare significantly different readouts. miRNA, microRNA; RT-qPCR, reverse transcriptase quantitative polymerase chain reaction.

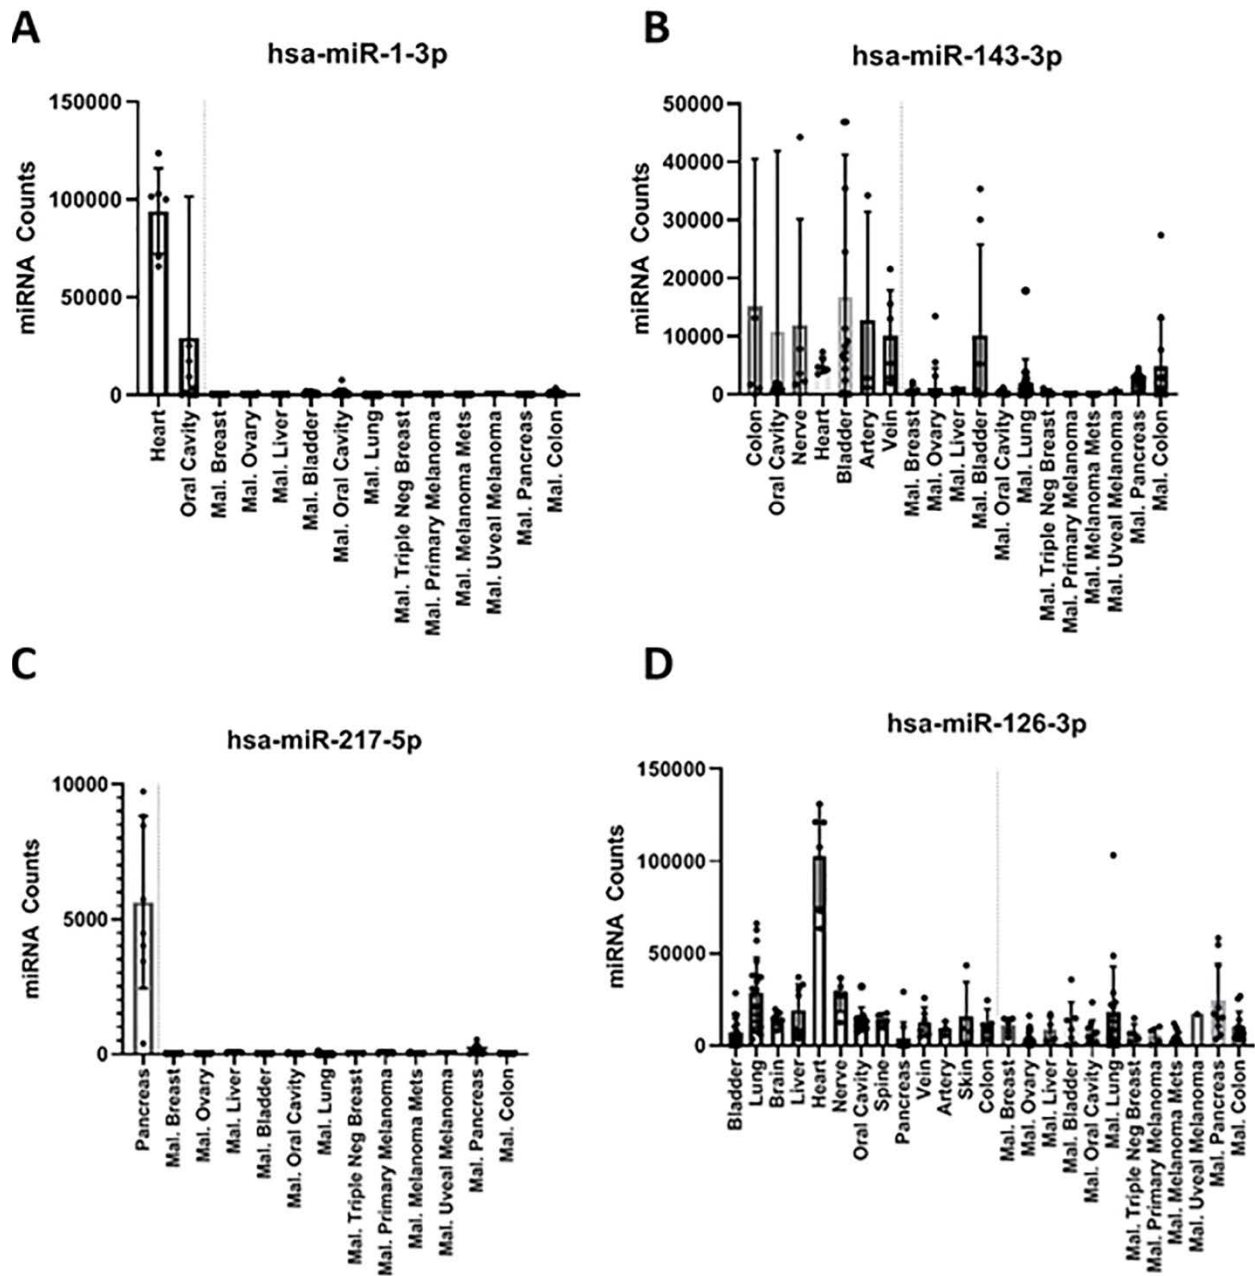

**Figure S3. Global Expression Profiling of Human Normal and Malignant Tissue miRNAs to Identify miRNAs for Host Tissue Protection.** Individual nanoString miRNA counts of multiple tissues of interest for additional host tissue protection are compared to each malignant tissue profiled. Highly-expressed normal tissue miRNAs are shown for cardiac and smooth muscle (A & B), pancreas (C), and endothelium (D). Mal, malignant.

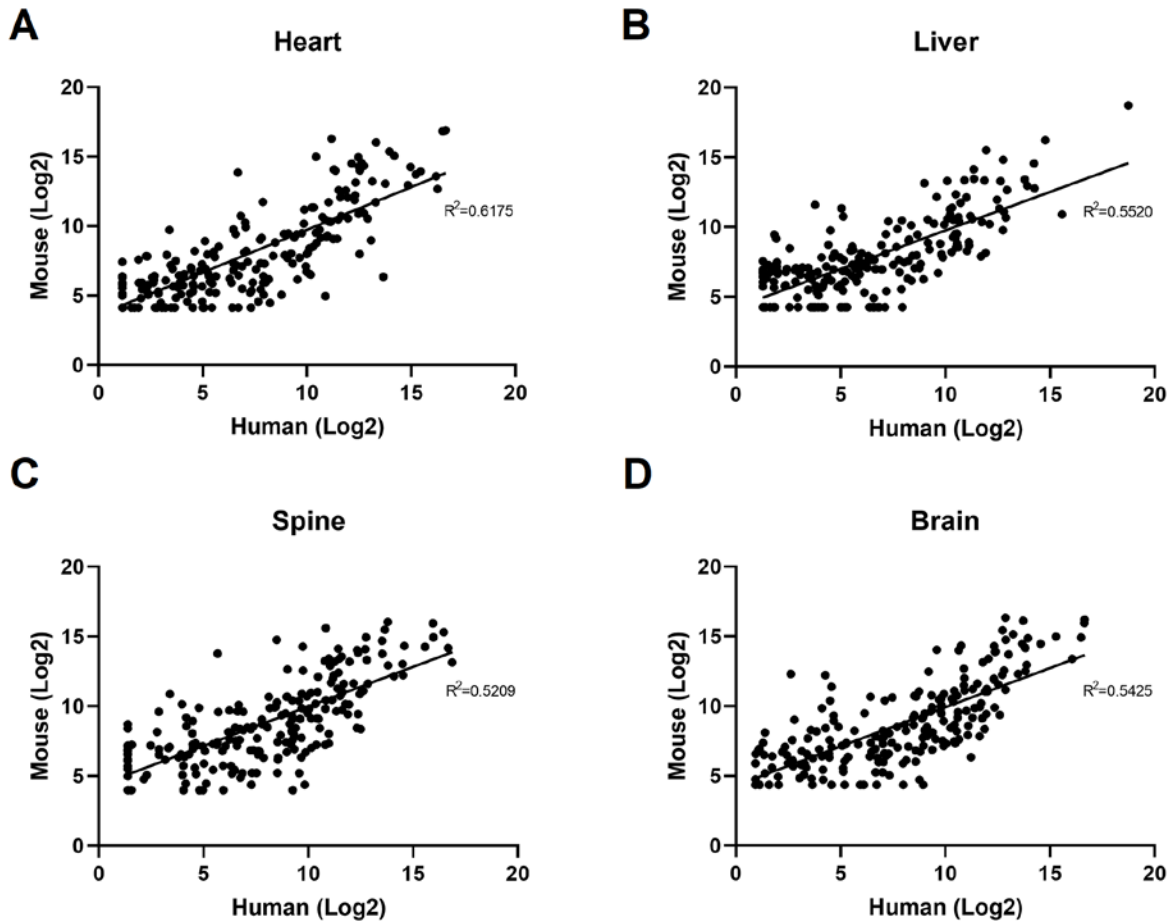

**Figure S4. Comparison of Expression Levels of miRNA in Human and Murine Tissues.** Individual miRNA counts of multiple tissue types were compared between species for individual miRNA expression. 216 miRNA (100% conserved mature miRNA sequence overlap between both human and mouse miRNA nanoString panels) counts are plotted in Log2 scale. Mouse miRNA are plotted on the Y-axis and human miRNA are plotted on the X-axis. Each graph is fit by a linear regression curve. In panels **A-D**, 6 heart, 8 liver, 4 spine and 10 brain human tissues are compared to 3 mouse tissue samples of each tissue type. Linear regression (Goodness of fit test) was calculated with GraphPad Prism (8.0).

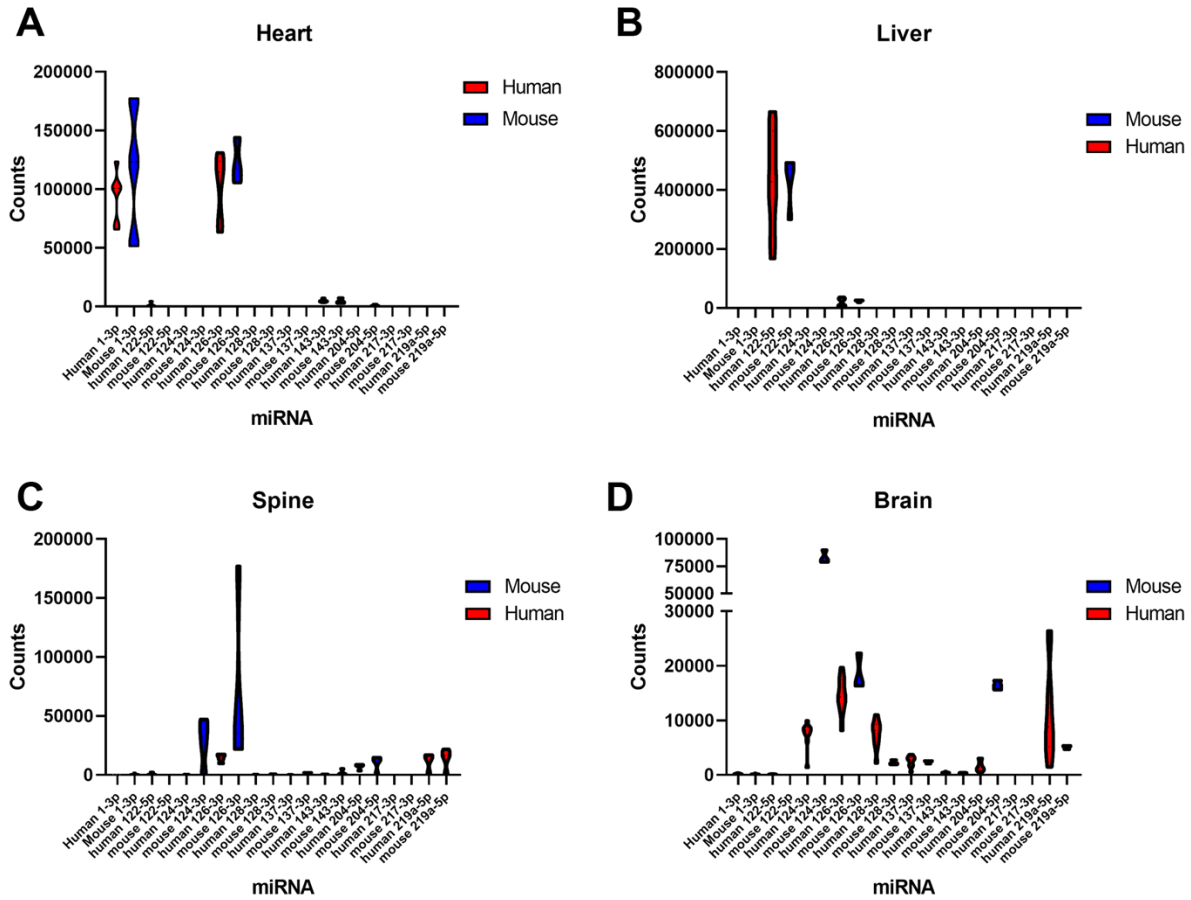

**Figure S5. Comparison of miRNA Level of Expression in a Subset of miRNA.** Individual miRNA counts of multiple tissue types were compared between species for multiple miRNAs that comprise the ONCR-159 miR-T configuration. In panels A-D, 6 heart, 8 liver, 4 spine and 10 brain human tissues are compared to 3 mouse tissue samples of each tissue type.

## A Design strategy for low structure, redundant, chimeric miRNA cassettes

- 1) Randomly interleave tissue specific miRNAs and generate spacers
- 2) Remove OncomiR targets, select candidates with minimal structure.

Targets: Tissue Cell Type 1, Tissue Cell Type 2, Tissue Cell Type 3

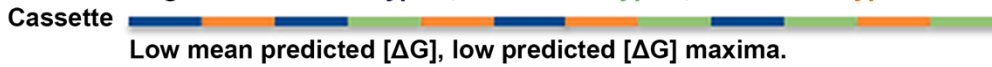

## B

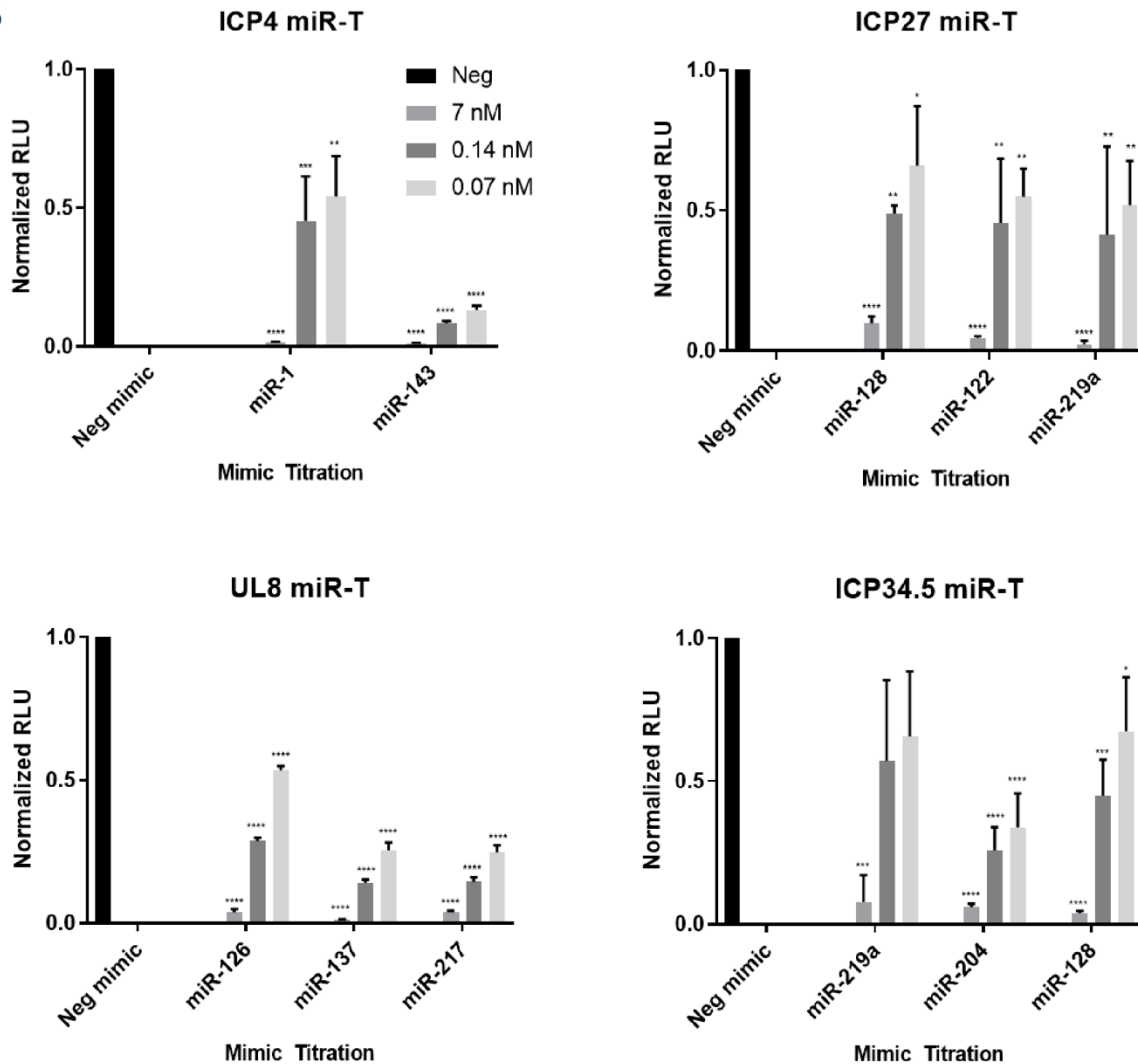

**Figure S6. Next-generation of Minimal Size and Maximize Efficacy of miR-T Cassettes.** (A) Description of the bioinformatics processes for miR-T cassette designs. Briefly, cassettes were made *in silico* and were scanned to reduce secondary structure and spurious miRNA targeting. (B-E) Dual-luciferase constructs were constructed with psiCHECK™-2 and tested in a mimic titration to validate efficient repression *in vitro* for the cassettes included in the ICP4, ICP27, UL8, and ICP34.5 loci, respectively. miRvana miRNA mimic titrations were co-transfected in HEK293 cells using Lipofectamine 2000 and 50 ng of plasmid DNA for the vector containing the miR-T in biological and technical triplicate. miRNA, microRNA; miR-T, miRNA-binding cassettes; Neg, negative. One-way ANOVA Dunnett's multiple comparisons test was used for statistical analysis. \*p<0.05; \*\*p<0.01; \*\*\*p<0.005; \*\*\*\*p<0.0001.

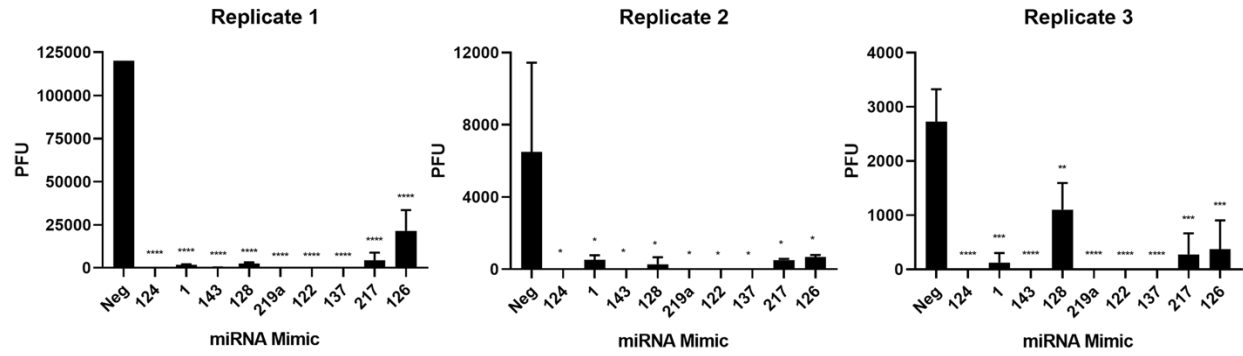

**Figure S7. Individual miRNA Attenuates ONCR-159 Viral Replication.** Viral replication was assessed in A253 cells transfected with the indicated mimics and infected with ONCR-159 for 72 hrs. Viral replication is shown as total PFU counts determined by virus plaque titer assay. PFU is plotted across 3 individual replicates. Statistical significance was calculated using Bonferroni-Dunn Student's T-test, \* $p < 0.05$ ; \*\* $p < 0.01$ ; \*\*\* $p < 0.005$ ; \*\*\*\* $p < 0.00001$ . PFU, plaque forming units. miRNA, microRNA; miR-T, Neg, negative; PFU, plaque-forming unit.

**Figure S8. Physiologic Validation of Mimic Amounts Used in miRNA Mimic Assay.** A253 cells transiently transfected with miRNA mimics were collected for RNA isolation at 24 hours post-transfection. This parallels the time point at which viral infection is performed for viral replication assessment. miRNA RT-qPCR was performed in technical triplicate to quantify transient miRNA expressed *in vitro* in relation to endogenous miRNA levels from 5 human brain tissue isolates. Fold change (FC) was determined by normalizing miRNA copy number from cells transiently transfected miRNA mimics to miRNA levels expressed in human brain normal tissue. Assessment of levels of expression of (A) hsa-miR-124-3p, (B) hsa-miR-128-3p, and (C) hsa-miR-137-3p. Supernatant from A253 cells transiently transfected with mimic miRNA and infected with ONCR-159 at 0.1 multiplicity of infection were collected after 3 days. Viral production was determined in a plaque assay in Vero cells. (D) Three miRNA endogenously expressed in human brain tissue, hsa-miR-124-3p, hsa-miR-128-3p, and hsa-miR-137-3p, were titrated to define a dynamic threshold to assess miRNA-mediated viral replication of ONCR-159. Titer ratio was determined by normalizing the plaque counts obtained by the negative mimic control. Statistical significance was calculated using Bonferroni-Dunn student's T-test, \*\*\*\*p<0.00001; \*\*p=0.003. FC, fold change; miRNA, microRNA; Neg, negative; RT-qPCR, reverse transcriptase quantitative polymerase chain reaction.



**Figure S9. ONCR-159 Viral Biodistribution Kinetics in the A20 Syngeneic Bilateral Tumor Model.** Viral genomic (US6/gD locus) DNA levels were quantified within the indicated tissues by a qRT-PCR assay either **(A)** 24 hours after a  $3 \times 10^5$  PFU IT dose or **(B)** at the indicated time point after a  $3 \times 10^6$  PFU IT dose of ONCR-159. The sensitivity limit of the assay (40 genome copies/ $\mu$ g DNA) is indicated as a dashed line. **(A)** N=5/group; **(B)** N=7/group.

**Figure S10. Efficacy of ONCR-157 and ONCR-159 on the A20, MC38, and B16F10N1 Tumor Models.**  
Individual tumor volume curves for each treatment are shown after IT administration of PBS or  $3 \times 10^6$  PFU (A20; MC38) or  $6 \times 10^6$  (B16F10N1) PFU of ONCR-159 or ONCR-157. Dosing occurred on days 1, 4, and 7, where Day 1 = day of dose initiation. N=8-10 mice/group.

## References

1. Ameres, SL, Martinez, J, and Schroeder, R (2007). Molecular basis for target RNA recognition and cleavage by human RISC. *Cell* **130**: 101-112.
2. Enright, AJ, John, B, Gaul, U, Tuschl, T, Sander, C, and Marks, DS (2003). MicroRNA targets in *Drosophila*. *Genome Biol* **5**: R1.
3. Gagan, J, Dey, BK, Layer, R, Yan, Z, and Dutta, A (2012). Notch3 and Mef2c proteins are mutually antagonistic via Mkp1 protein and miR-1/206 microRNAs in differentiating myoblasts. *J Biol Chem* **287**: 40360-40370.
4. Xie, D, Song, H, Wu, T, Li, D, Hua, K, Xu, H, *et al.* (2018). MicroRNA424 serves an antioncogenic role by targeting cyclindependent kinase 1 in breast cancer cells. *Oncol Rep* **40**: 3416-3426.
5. Fornari, F, Gramantieri, L, Giovannini, C, Veronese, A, Ferracin, M, Sabbioni, S, *et al.* (2009). MiR-122/cyclin G1 interaction modulates p53 activity and affects doxorubicin sensitivity of human hepatocarcinoma cells. *Cancer Res* **69**: 5761-5767.
6. Gramantieri, L, Ferracin, M, Fornari, F, Veronese, A, Sabbioni, S, Liu, CG, *et al.* (2007). Cyclin G1 is a target of miR-122a, a microRNA frequently down-regulated in human hepatocellular carcinoma. *Cancer Res* **67**: 6092-6099.
7. Cheng, LC, Pastrana, E, Tavazoie, M, and Doetsch, F (2009). miR-124 regulates adult neurogenesis in the subventricular zone stem cell niche. *Nat Neurosci* **12**: 399-408.
8. Silber, J, Hashizume, R, Felix, T, Hariono, S, Yu, M, Berger, MS, *et al.* (2013). Expression of miR-124 inhibits growth of medulloblastoma cells. *Neuro Oncol* **15**: 83-90.
9. Fish, JE, Santoro, MM, Morton, SU, Yu, S, Yeh, RF, Wythe, JD, *et al.* (2008). miR-126 regulates angiogenic signaling and vascular integrity. *Dev Cell* **15**: 272-284.
10. Hamada, S, Satoh, K, Fujibuchi, W, Hirota, M, Kanno, A, Unno, J, *et al.* (2012). MiR-126 acts as a tumor suppressor in pancreatic cancer cells via the regulation of ADAM9. *Mol Cancer Res* **10**: 3-10.
11. Jusufovic, E, Rijavec, M, Keser, D, Korosec, P, Sodja, E, Iljazovic, E, *et al.* (2012). let-7b and miR-126 are down-regulated in tumor tissue and correlate with microvessel density and survival outcomes in non-small-cell lung cancer. *PLoS One* **7**: e45577.
12. Smirnova, L, Grafe, A, Seiler, A, Schumacher, S, Nitsch, R, and Wulczyn, FG (2005). Regulation of miRNA expression during neural cell specification. *Eur J Neurosci* **21**: 1469-1477.
13. Skalsky, RL, and Cullen, BR (2011). Reduced expression of brain-enriched microRNAs in glioblastomas permits targeted regulation of a cell death gene. *PLoS One* **6**: e24248.
14. Smrt, RD, Szulwach, KE, Pfeiffer, RL, Li, X, Guo, W, Pathania, M, *et al.* (2010). MicroRNA miR-137 regulates neuronal maturation by targeting ubiquitin ligase mind bomb-1. *Stem Cells* **28**: 1060-1070.
15. Elia, L, Quintavalle, M, Zhang, J, Contu, R, Cossu, L, Latronico, MV, *et al.* (2009). The knockout of miR-143 and -145 alters smooth muscle cell maintenance and vascular homeostasis in mice: correlates with human disease. *Cell Death Differ* **16**: 1590-1598.
16. Kent, OA, McCall, MN, Cornish, TC, and Halushka, MK (2014). Lessons from miR-143/145: the importance of cell-type localization of miRNAs. *Nucleic Acids Res* **42**: 7528-7538.
17. Ying, Z, Li, Y, Wu, J, Zhu, X, Yang, Y, Tian, H, *et al.* (2013). Loss of miR-204 expression enhances glioma migration and stem cell-like phenotype. *Cancer Res* **73**: 990-999.
18. Zhao, WG, Yu, SN, Lu, ZH, Ma, YH, Gu, YM, and Chen, J (2010). The miR-217 microRNA functions as a potential tumor suppressor in pancreatic ductal adenocarcinoma by targeting KRAS. *Carcinogenesis* **31**: 1726-1733.
19. Wang, H, Dong, X, Gu, X, Qin, R, Jia, H, and Gao, J (2015). The MicroRNA-217 Functions as a Potential Tumor Suppressor in Gastric Cancer by Targeting GPC5. *PLoS One* **10**: e0125474.
20. Zhang, M, Li, M, Li, N, Zhang, Z, Liu, N, Han, X, *et al.* (2017). miR-217 suppresses proliferation, migration, and invasion promoting apoptosis via targeting MTDH in hepatocellular carcinoma. *Oncol Rep* **37**: 1772-1778.
21. Dugas, JC, and Notterpek, L (2011). MicroRNAs in oligodendrocyte and Schwann cell differentiation. *Dev Neurosci* **33**: 14-20.
22. Huang, N, Lin, J, Ruan, J, Su, N, Qing, R, Liu, F, *et al.* (2012). MiR-219-5p inhibits hepatocellular carcinoma cell proliferation by targeting glypican-3. *FEBS Lett* **586**: 884-891.
23. Rao, SA, Arimappagan, A, Pandey, P, Santosh, V, Hegde, AS, Chandramouli, BA, *et al.* (2013). miR-219-5p inhibits receptor tyrosine kinase pathway by targeting EGFR in glioblastoma. *PLoS One* **8**: e63164.
